# Supplementary material for: Design, Synthesis and Biological Activity of Novel Methoxy- and Hydroxy-Substituted N-Benzimidazole-Derived Carboxamides
Source: MDPI journal article supplement (doi:10.3390/molecules29092138), 2024-05-04

**Design, synthesis and biological activity of novel methoxy and hydroxy substituted  
N- benzimidazole derived carboxamides**

Anja Beč<sup>1</sup>, Katarina Zlatić<sup>2</sup>, Mihailo Banjanac<sup>3</sup>, Vedrana Radovanović<sup>3</sup>, Kristina Starčević<sup>4</sup>,  
Marijeta Kralj<sup>2</sup> and Marijana Hranjec<sup>1\*</sup>

<sup>1</sup> Department of Organic Chemistry, Faculty of Chemical Engineering and Technology,  
University of Zagreb, Marulićev trg 19, HR-10000 Zagreb, Croatia

<sup>2</sup> Division of Molecular Medicine, Ruđer Bošković Institute, Bijenička cesta 54, HR-10000  
Zagreb, Croatia

<sup>3</sup> Pharmacology *in vitro*, Selvita Ltd. Prilaz baruna Filipovića 29, 10000 Zagreb, Croatia

<sup>4</sup> Department of Chemistry and Biochemistry, Faculty of Veterinary Medicine, University of  
Zagreb, Heinzelova 55, HR-10000 Zagreb, Croatia

**Content of SI**

**1. Figures S1-S62:** NMR spectra of prepared compounds

**2. Figures S63:** Reaction scheme for the preparation of compounds **1–6**

**Figure S1.**  $^1\text{H}$  NMR spectrum (DMSO- $d_6$ , 600 MHz) of *(E)*-2-(benzo[d]thiazol-2-yl)-3-phenylacrylonitrile 17

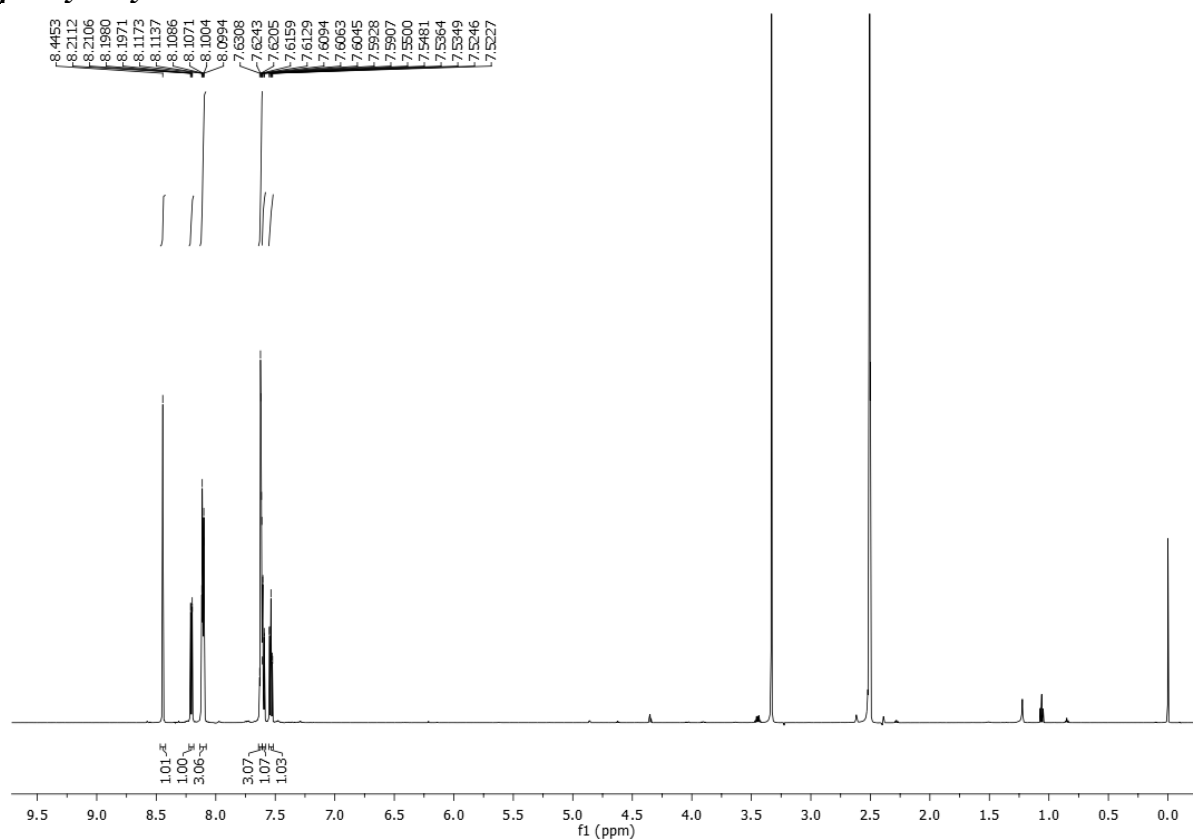

**Figure S2.**  $^{13}\text{C}$  NMR spectrum (DMSO- $d_6$ , 151 MHz) of *(E)*-2-(benzo[d]thiazol-2-yl)-3-phenylacrylonitrile 17

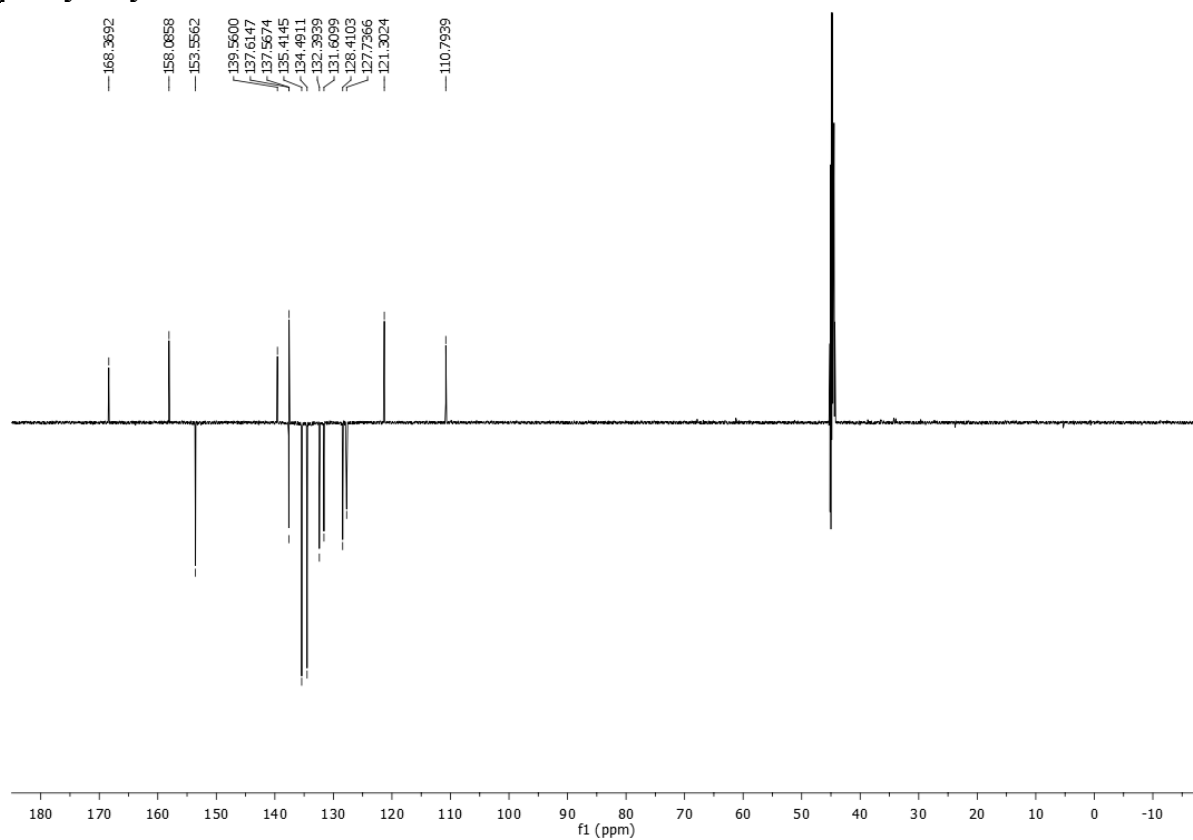

**Figure S3.**  $^1\text{H}$  NMR spectrum (DMSO- $d_6$ , 300 MHz) of *(E)*-2-(benzo[d]thiazol-2-yl)-3-(2-methoxyphenyl)acrylonitrile 18

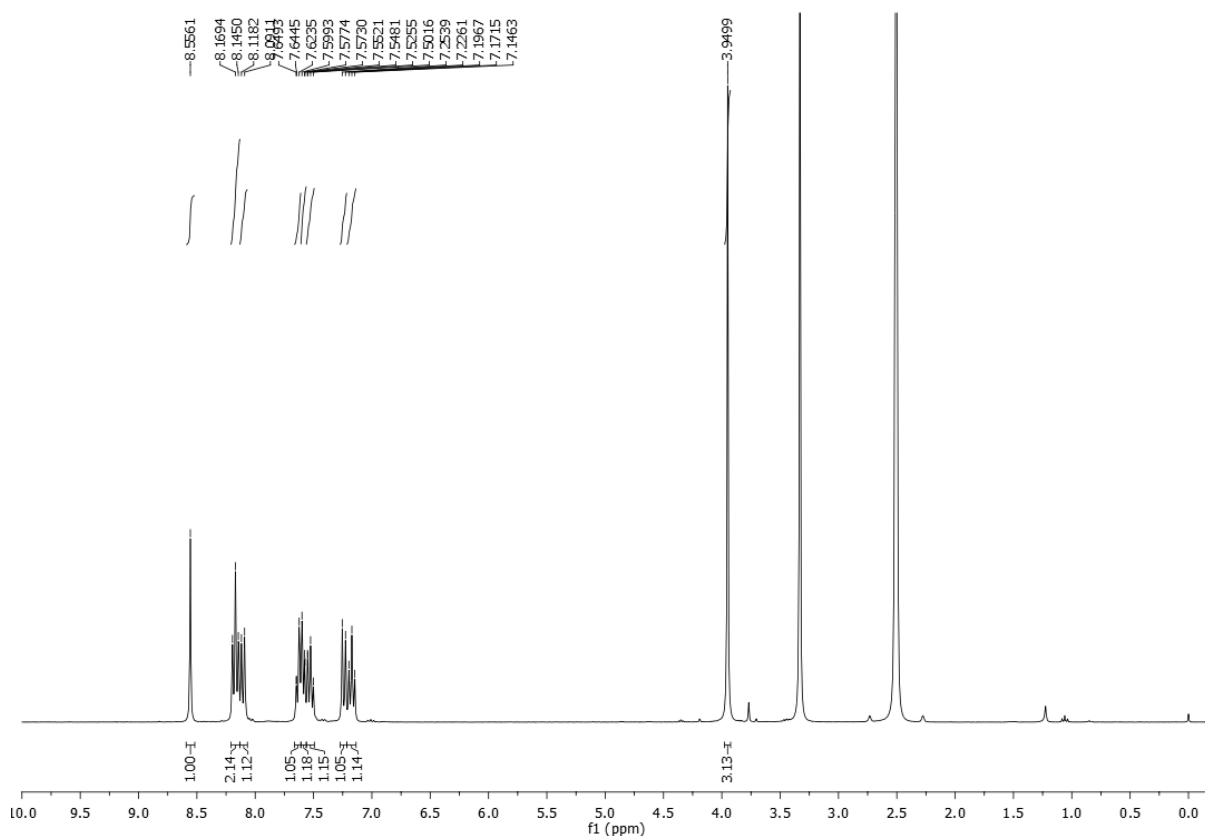

**Figure S4.**  $^{13}\text{C}$  NMR spectrum (DMSO- $d_6$ , 151 MHz) of *(E)*-2-(benzo[d]thiazol-2-yl)-3-(2-methoxyphenyl)acrylonitrile 18

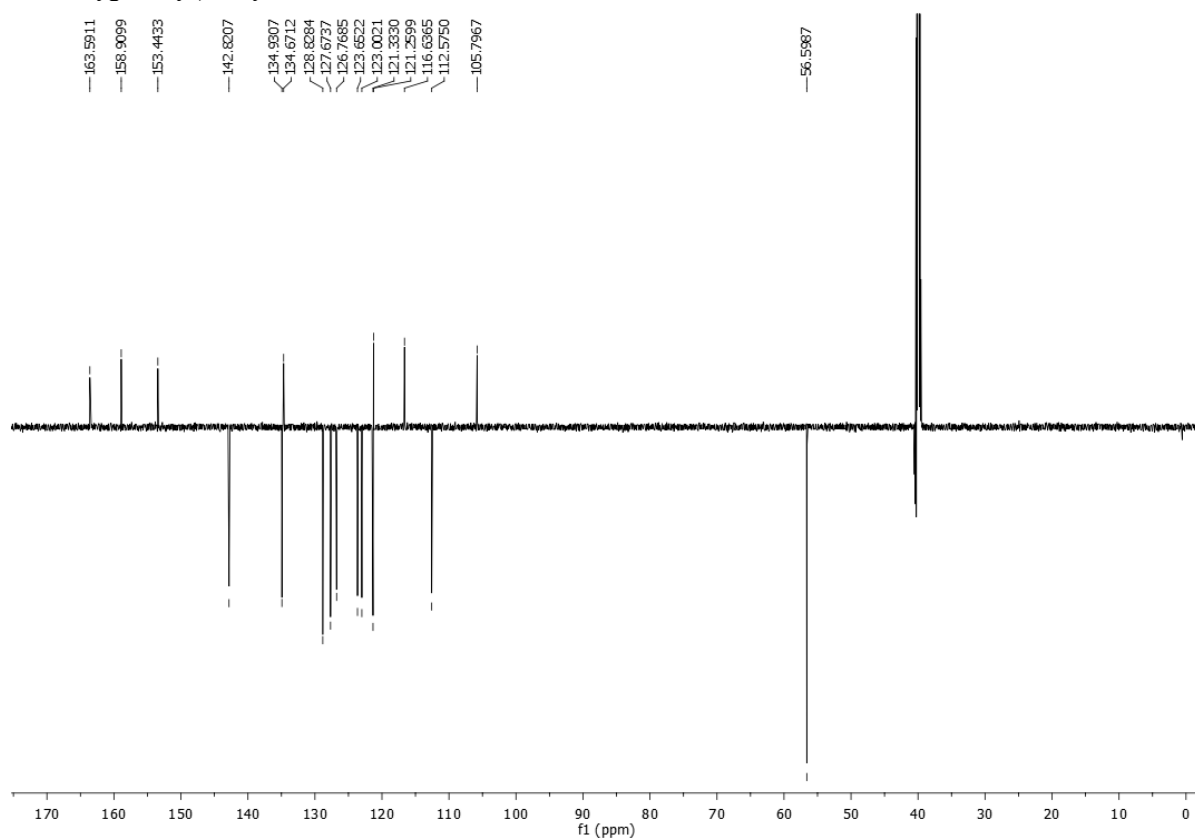

**Figure S5.**  $^1\text{H}$  NMR spectrum (DMSO- $d_6$ , 300 MHz) of *(E)*-2-(benzo[d]thiazol-2-yl)-3-(2,4-dimethoxyphenyl)acrylonitrile 19

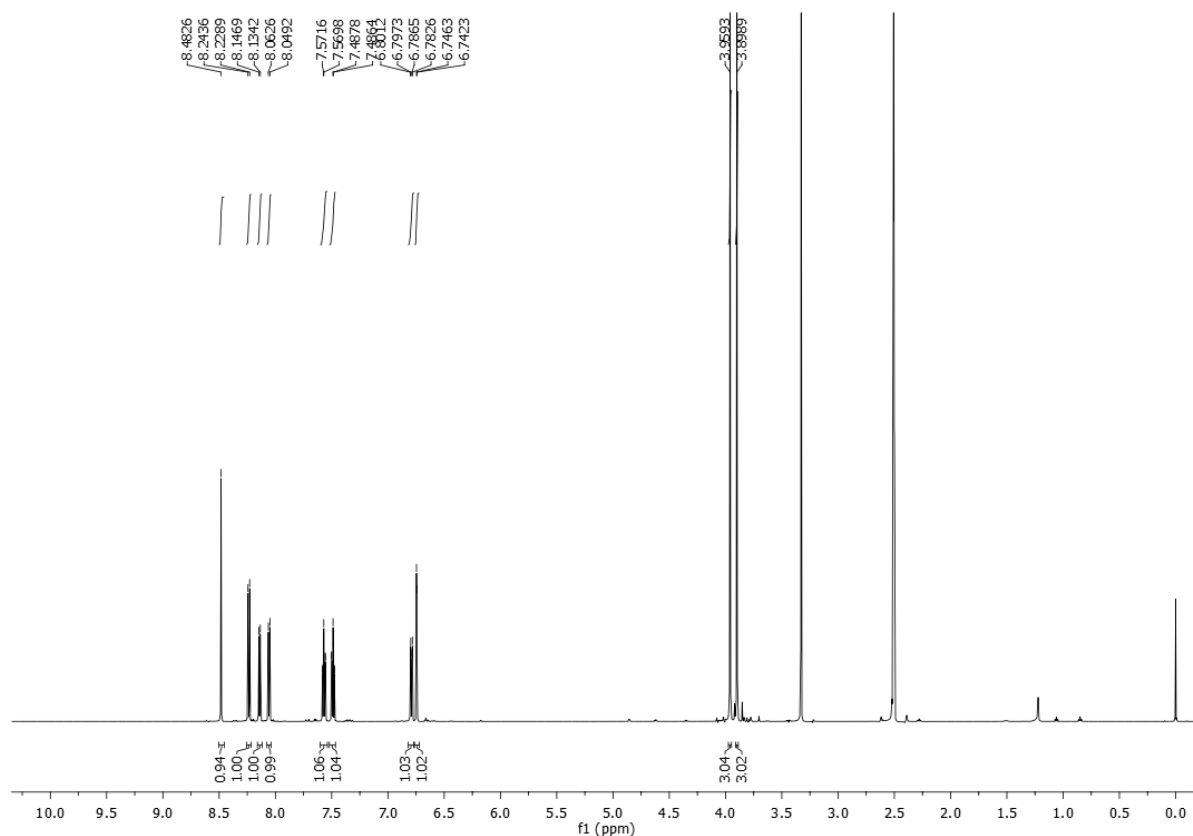

**Figure S6.**  $^{13}\text{C}$  NMR spectrum (DMSO- $d_6$ , 151 MHz) of *(E)*-2-(benzo[d]thiazol-2-yl)-3-(2,4-dimethoxyphenyl)acrylonitrile 19

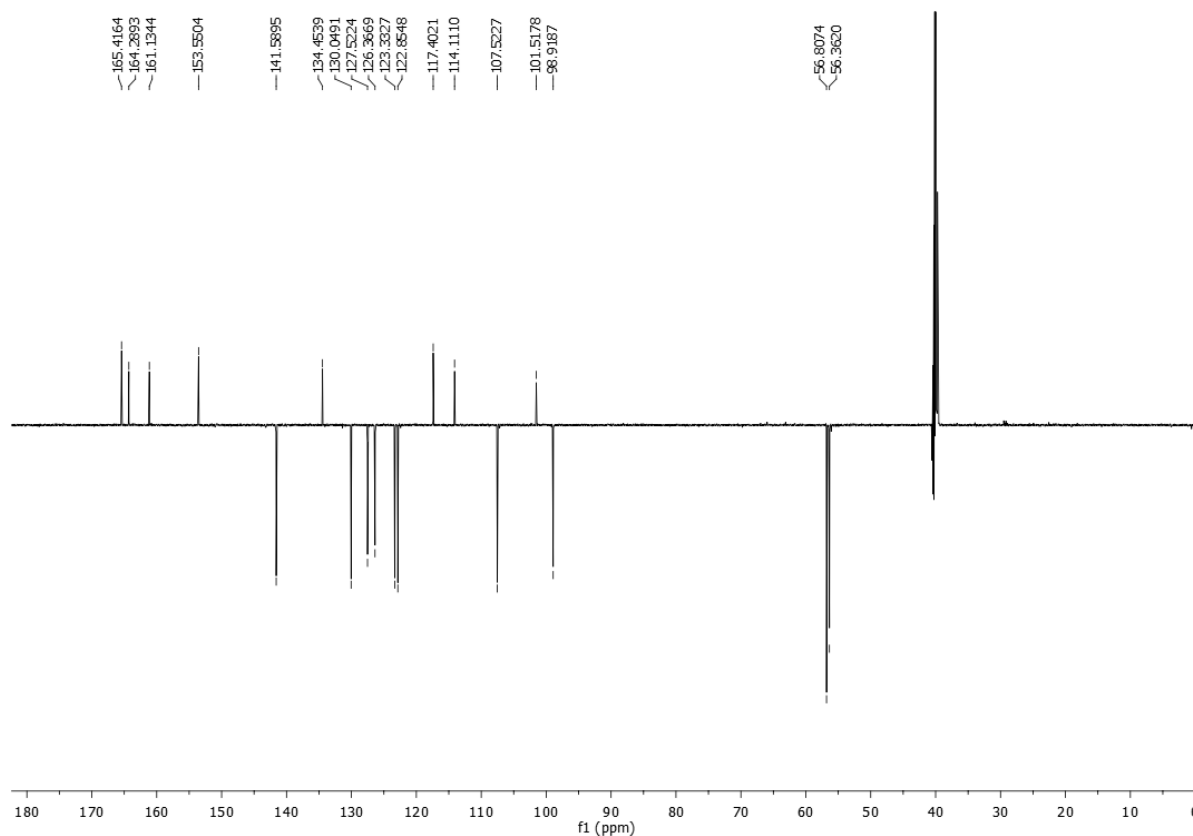

**Figure S7.**  $^1\text{H}$  NMR spectrum (DMSO- $d_6$ , 600 MHz) of *(E)*-2-(benzo[d]thiazol-2-yl)-3-(3,4,5-trimethoxyphenyl)acrylonitrile 20

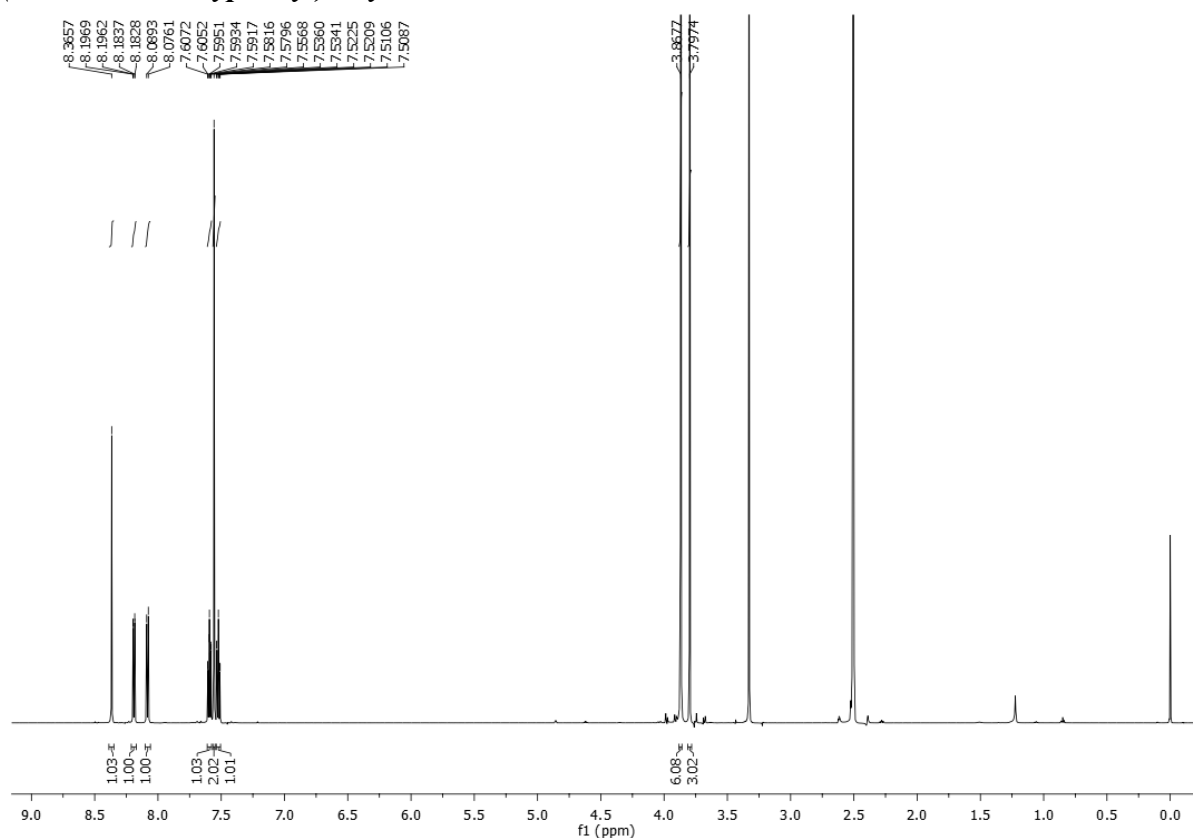

**Figure S8.**  $^{13}\text{C}$  NMR spectrum (DMSO- $d_6$ , 151 MHz) of *(E)*-2-(benzo[d]thiazol-2-yl)-3-(3,4,5-trimethoxyphenyl)acrylonitrile 20

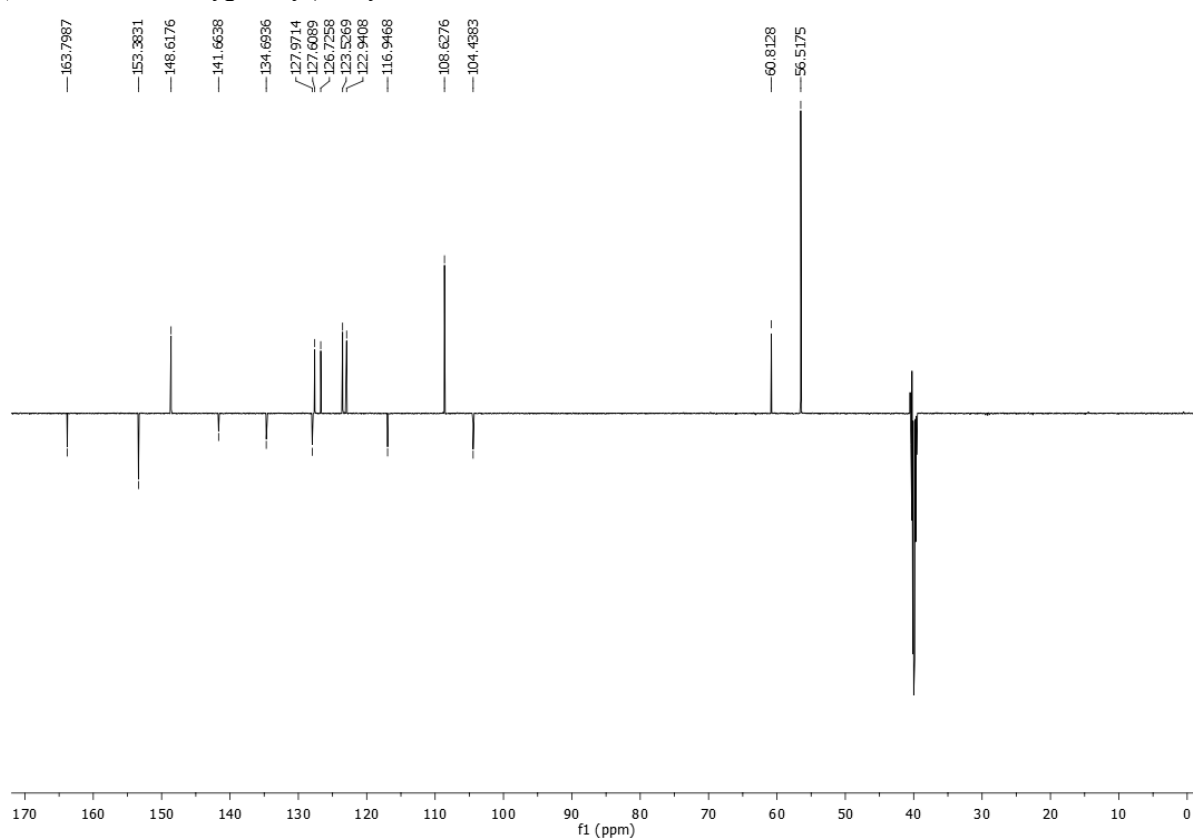

**Figure S9.**  $^1\text{H}$  NMR spectrum (DMSO- $d_6$ , 300 MHz) of *(E)*-2-(benzo[d]thiazol-2-yl)-3-(4-hydroxyphenyl)acrylonitrile 21

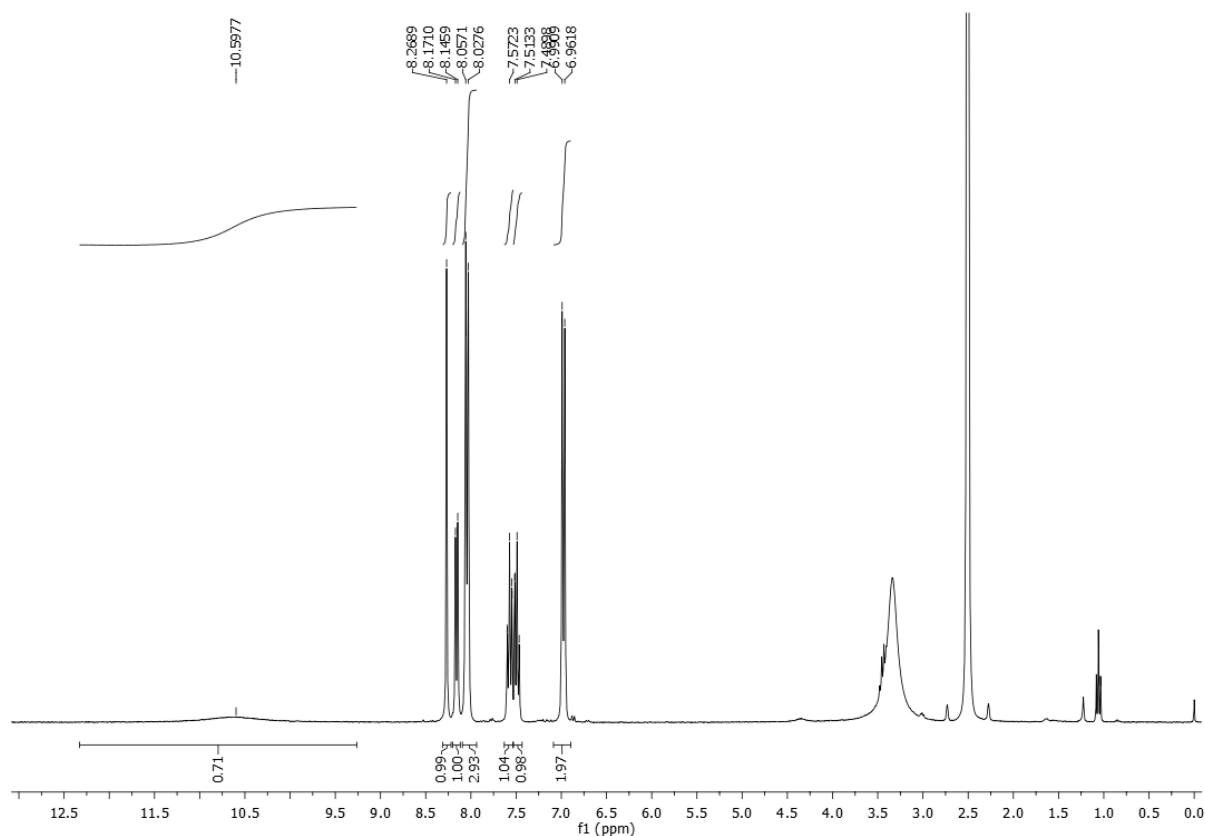

**Figure S10.**  $^{13}\text{C}$  NMR spectrum (DMSO- $d_6$ , 151 MHz) of *(E)*-2-(benzo[d]thiazol-2-yl)-3-(4-hydroxyphenyl)acrylonitrile 21

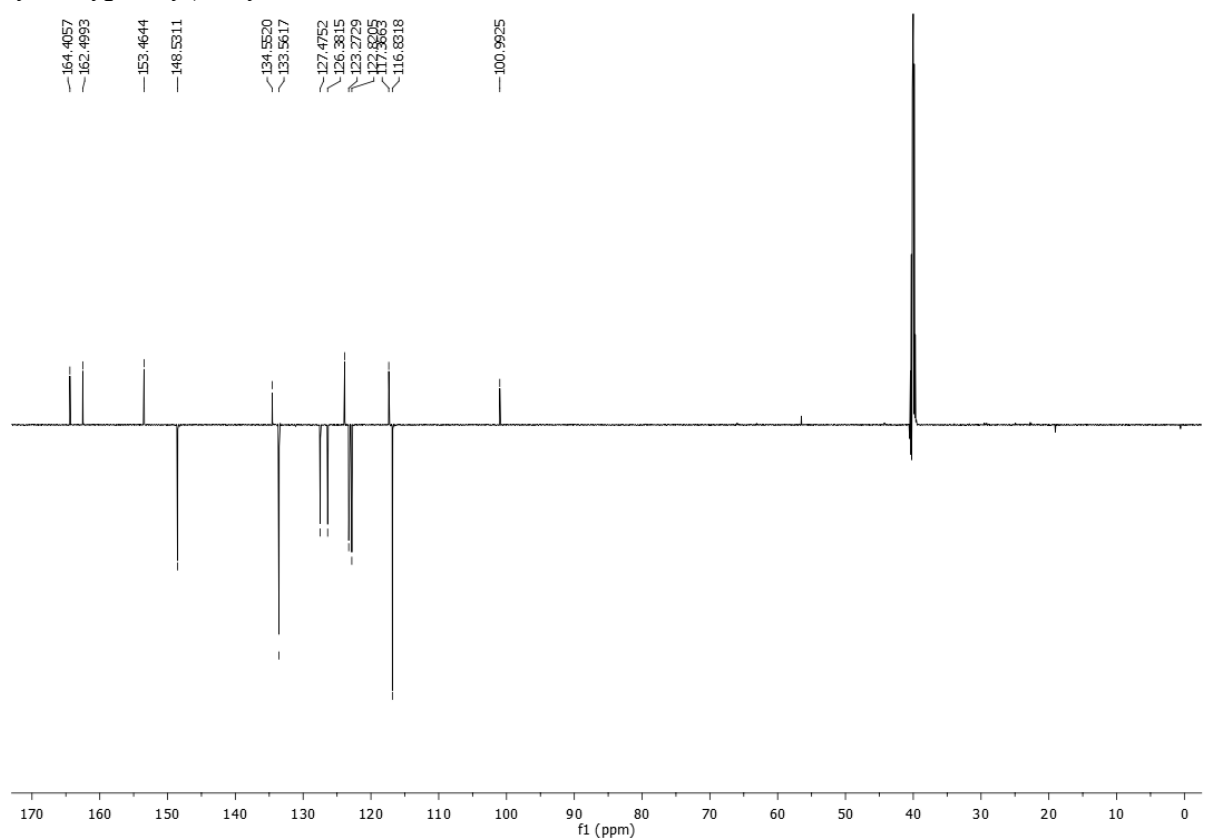

**Figure S11.**  $^1\text{H}$  NMR spectrum (DMSO- $d_6$ , 400 MHz) of *(E)*-2-(benzo[d]thiazol-2-yl)-3-(3,4-dihydroxyphenyl)acrylonitrile 22

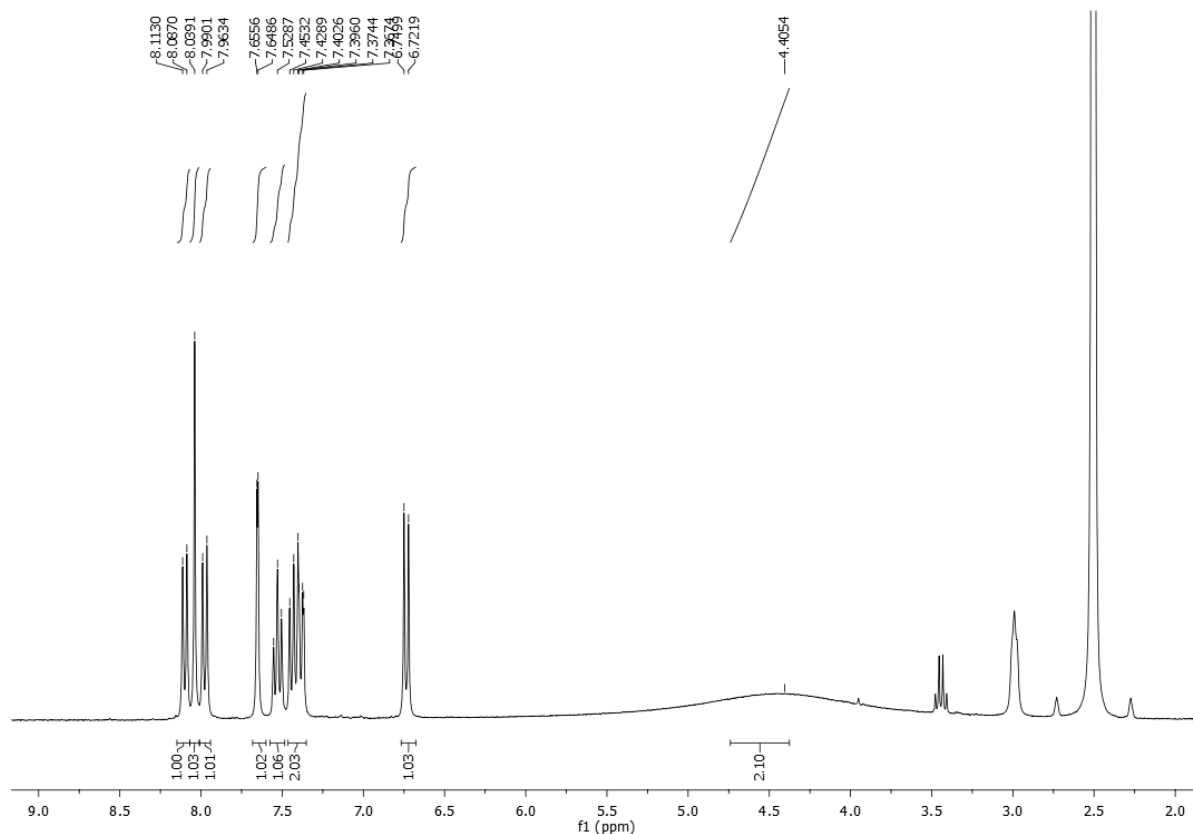

**Figure S12.**  $^{13}\text{C}$  NMR spectrum (DMSO- $d_6$ , 151 MHz) of *(E)*-2-(benzo[d]thiazol-2-yl)-3-(3,4-dihydroxyphenyl)acrylonitrile 22

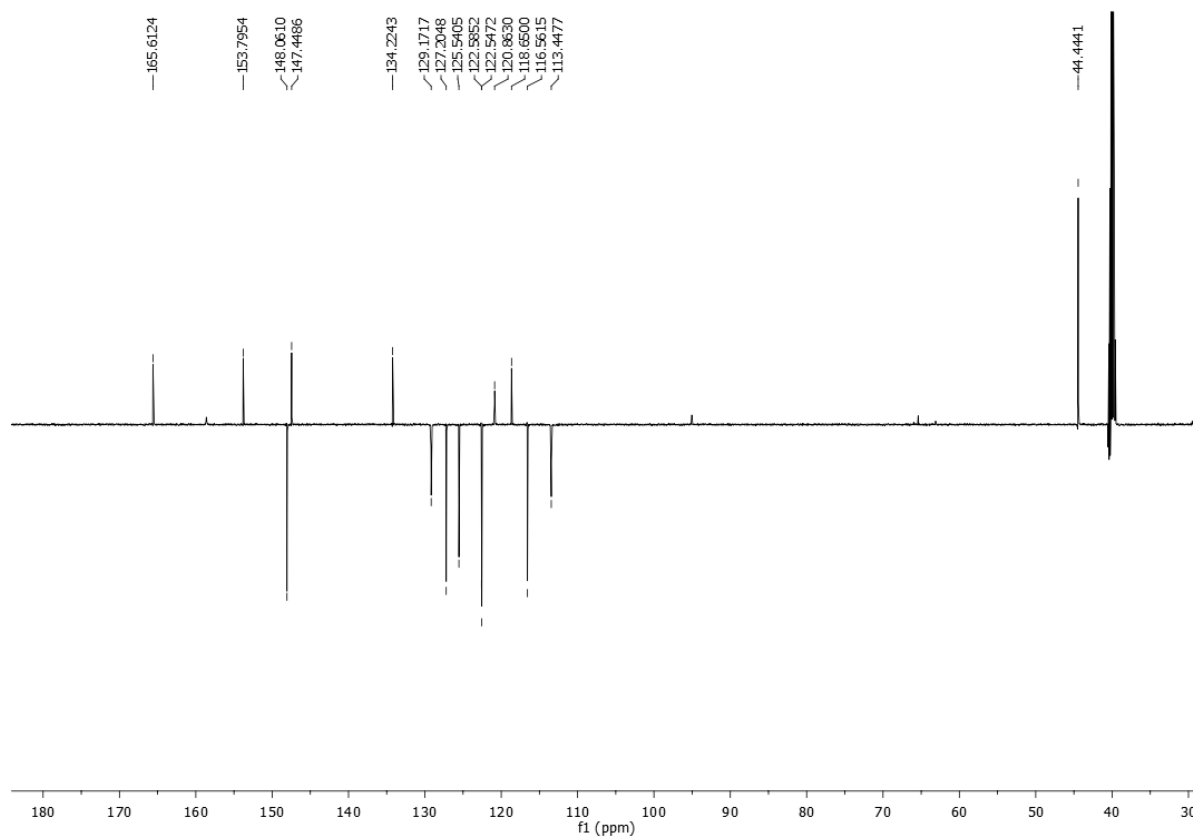

**Figure S13.**  $^1\text{H}$  NMR spectrum (DMSO- $d_6$ , 300 MHz) of *(E)*-2-(benzo[d]thiazol-2-yl)-3-(3,4,5-trihydroxyphenyl)acrylonitrile 23

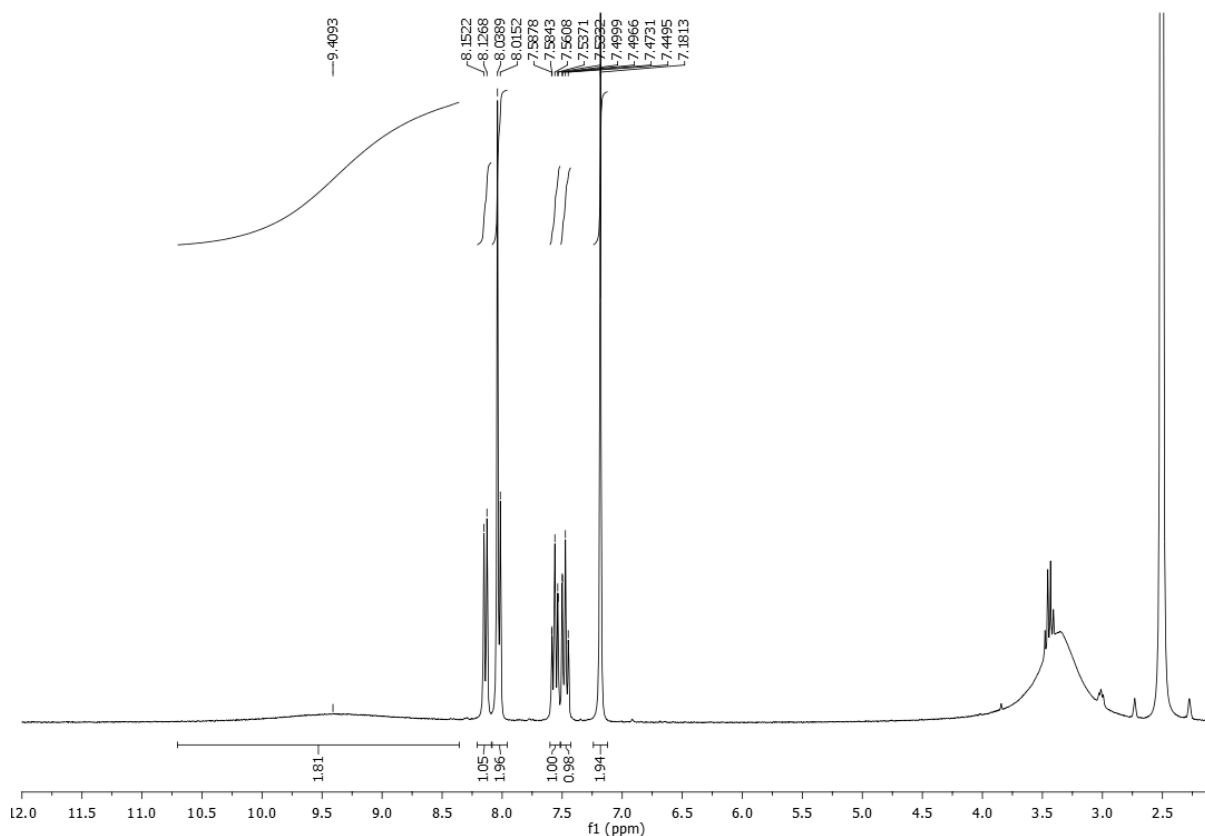

**Figure S14.**  $^{13}\text{C}$  NMR spectrum (DMSO- $d_6$ , 151 MHz) of *(E)*-2-(benzo[d]thiazol-2-yl)-3-(3,4,5-trihydroxyphenyl)acrylonitrile 23

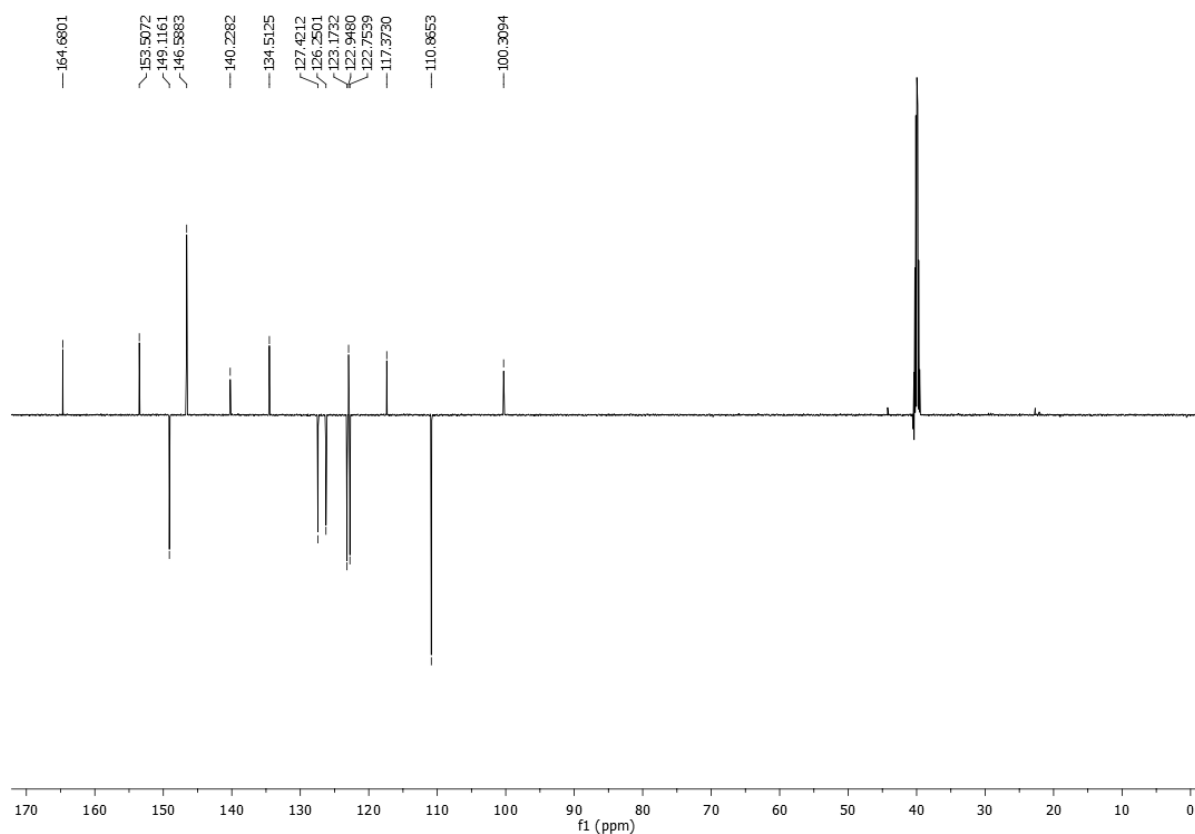



**Figure S15.**  $^1\text{H}$  NMR spectrum (DMSO- $d_6$ , 600 MHz) of *(E)*-2-(1*H*-benzo[d]imidazol-2-yl)-3-(4-hydroxyphenyl)acrylonitrile 24

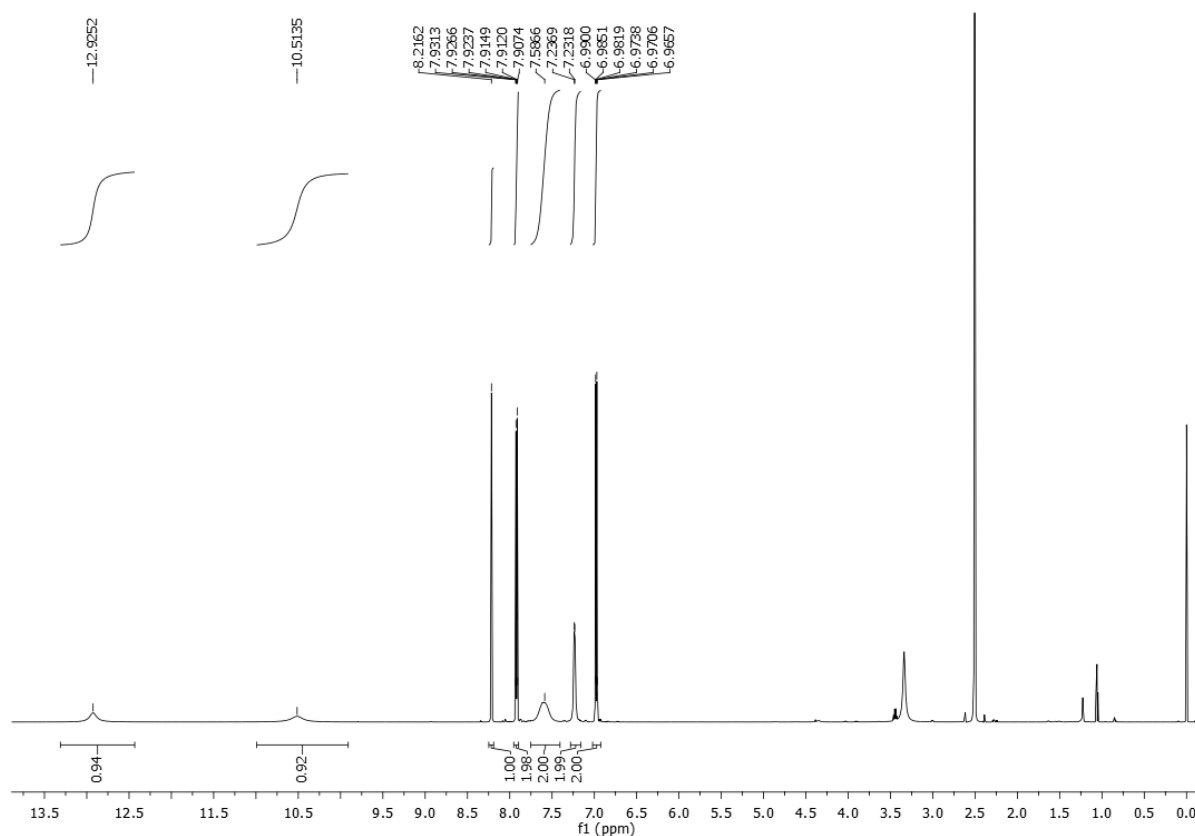

**Figure S16.**  $^{13}\text{C}$  NMR spectrum (DMSO- $d_6$ , 151 MHz) of *(E)*-2-(1*H*-benzo[d]imidazol-2-yl)-3-(4-hydroxyphenyl)acrylonitrile 24

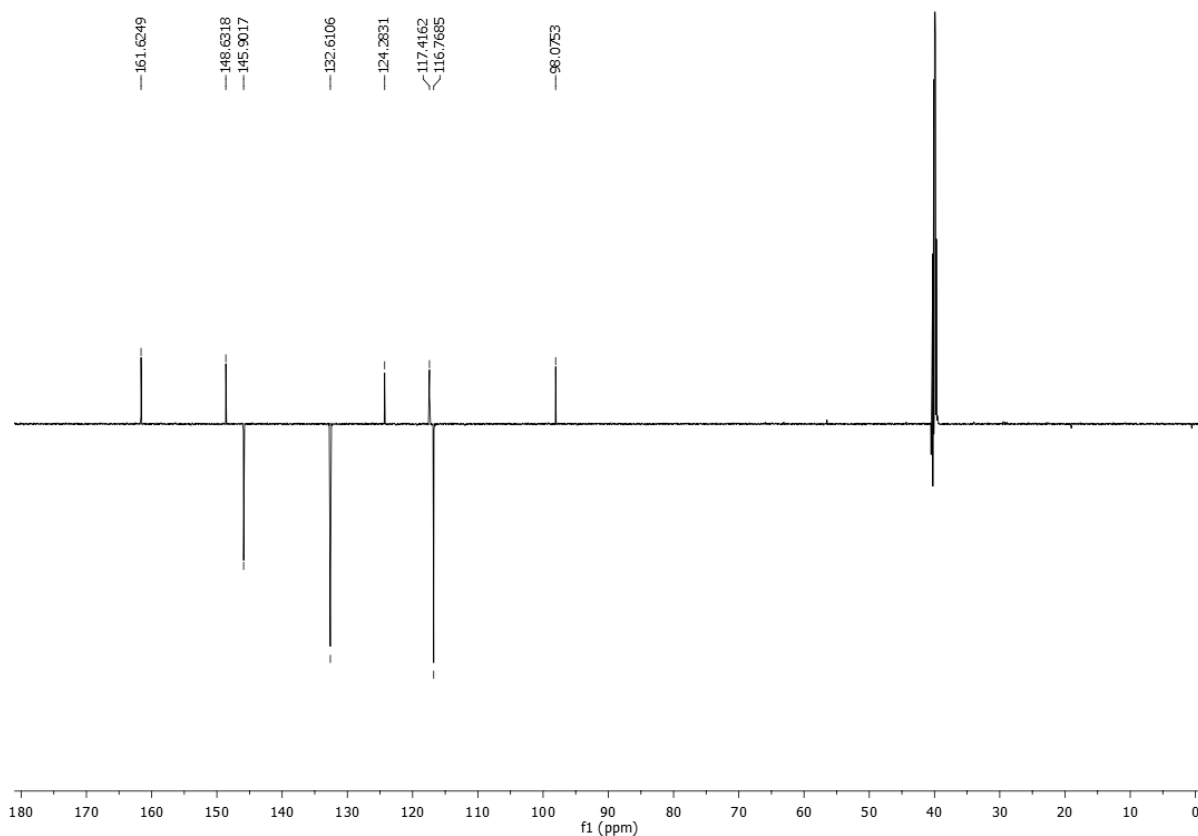

**Figure S17.**  $^1\text{H}$  NMR spectrum (DMSO- $d_6$ , 600 MHz) of *(E)*-2-(1*H*-benzo[d]imidazol-2-yl)-3-(3,4-dihydroxyphenyl)acrylonitrile 25

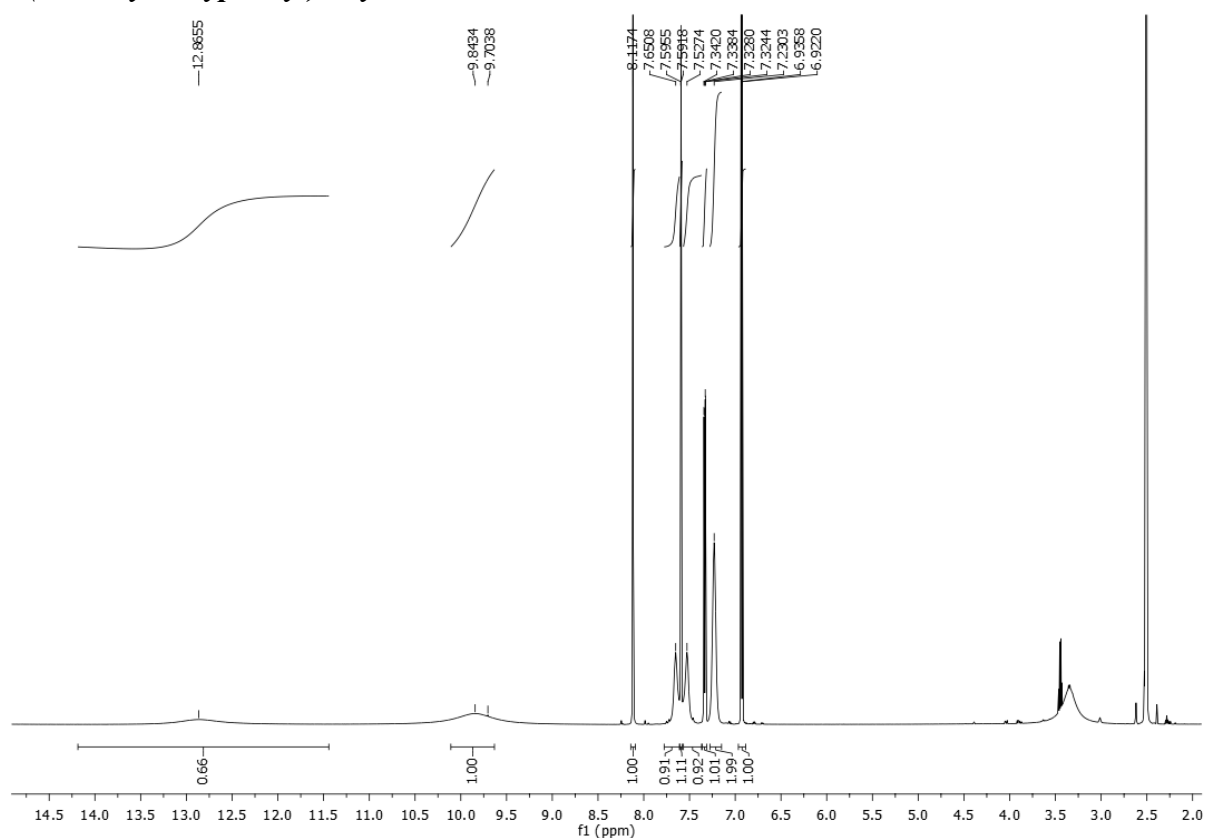

**Figure S18.**  $^{13}\text{C}$  NMR spectrum (DMSO- $d_6$ , 151 MHz) of *(E)*-2-(1*H*-benzo[d]imidazol-2-yl)-3-(3,4-dihydroxyphenyl)acrylonitrile 25

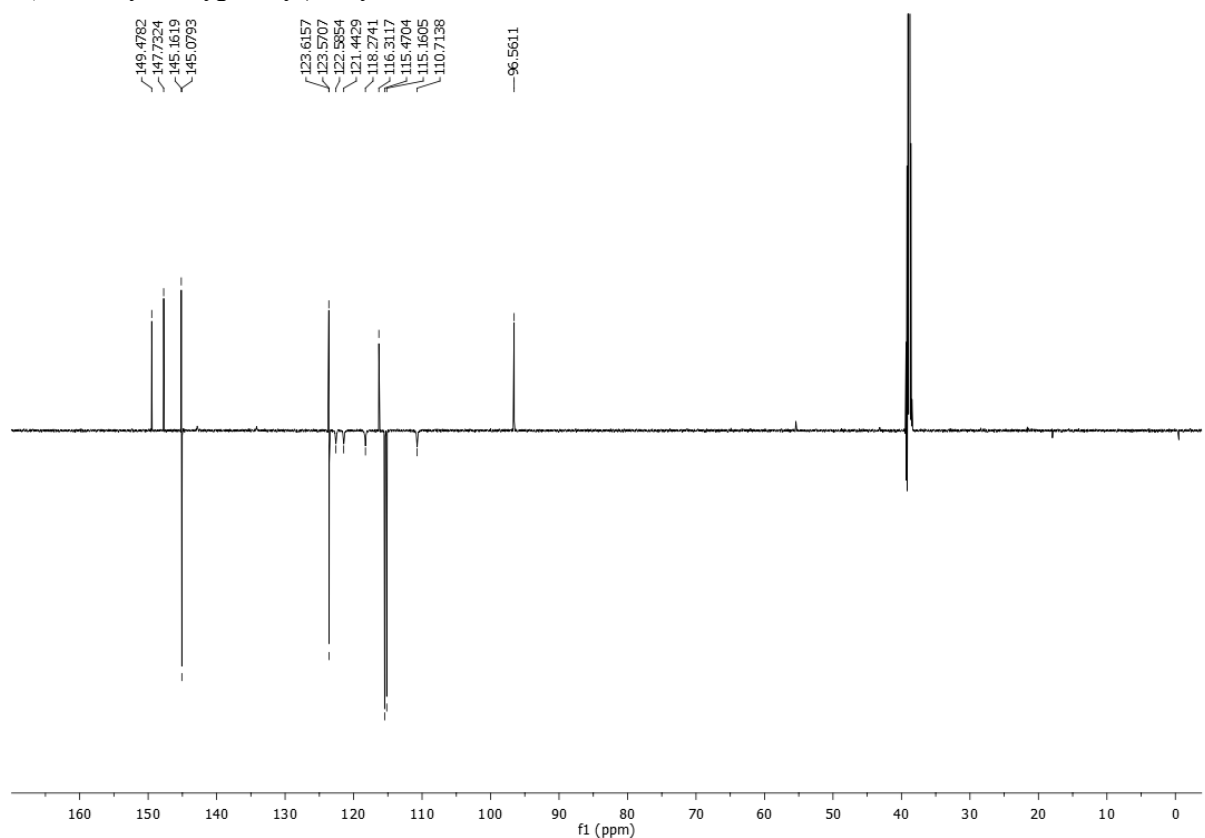

**Figure S19.**  $^1\text{H}$  NMR spectrum (DMSO- $d_6$ , 600 MHz) of *(E)*-2-(1*H*-benzo[d]imidazol-2-yl)-3-(3,4,5-trihydroxyphenyl)acrylonitrile **26**

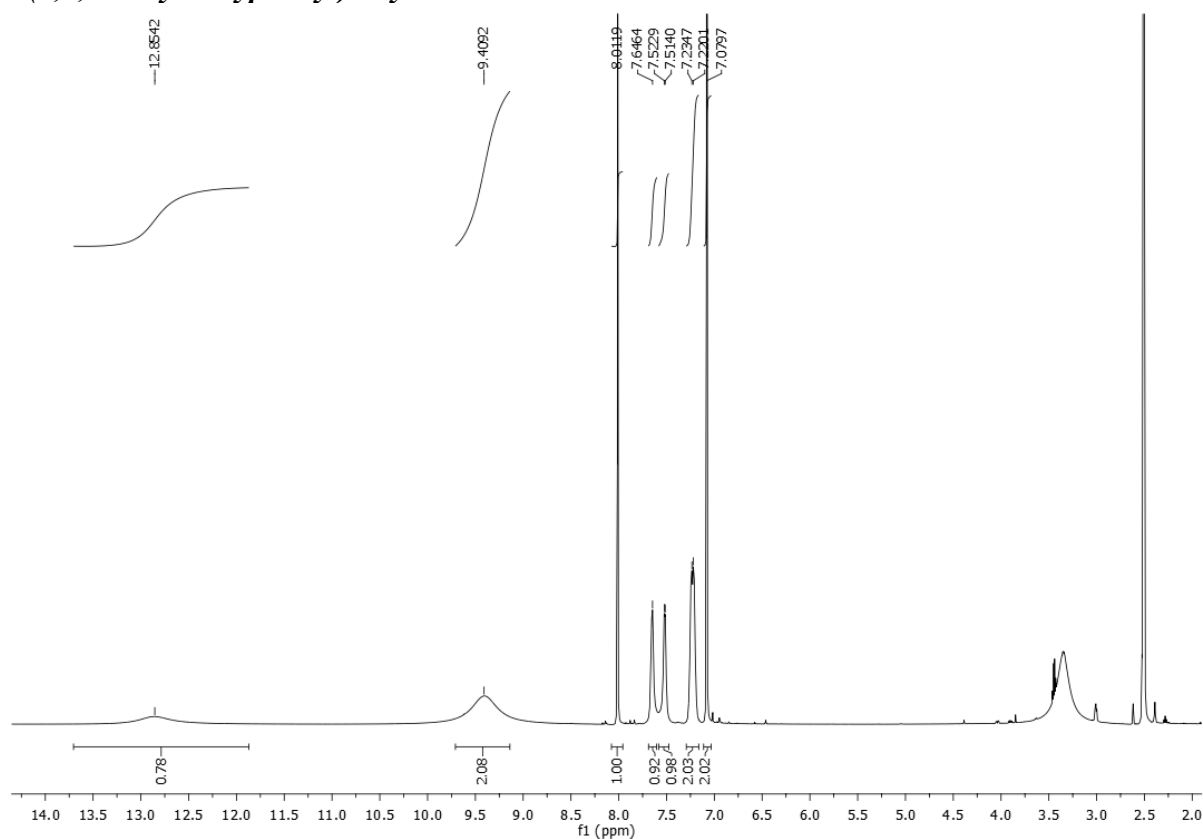

**Figure S20.**  $^{13}\text{C}$  NMR spectrum (DMSO- $d_6$ , 151 MHz) of *(E)*-2-(1*H*-benzo[d]imidazol-2-yl)-3-(3,4,5-trihydroxyphenyl)acrylonitrile **26**

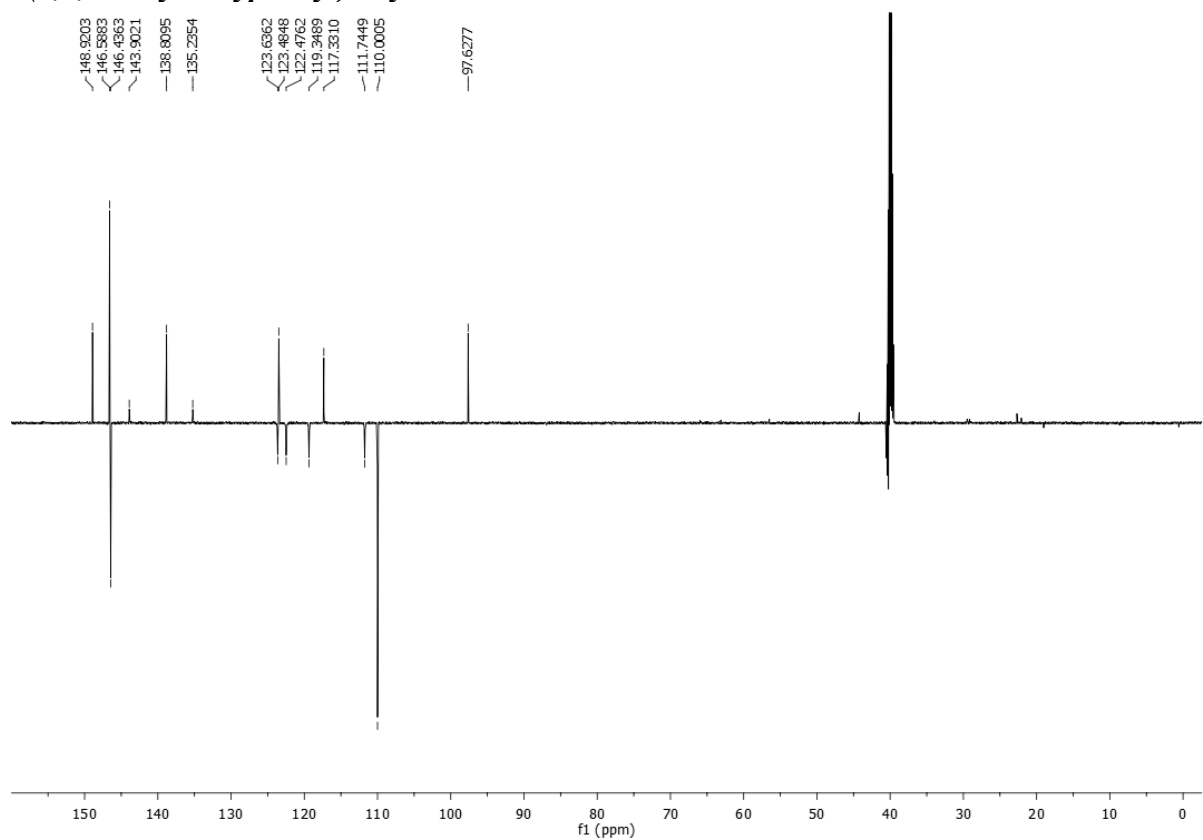

**Figure S21.**  $^1\text{H}$  NMR spectrum (DMSO- $d_6$ , 600 MHz) of *(E)*-2-(1-cyano-2-(4-hydroxyphenyl)vinyl)-1*H*-benzo[d]imidazole-5(6)-carbonitrile 27

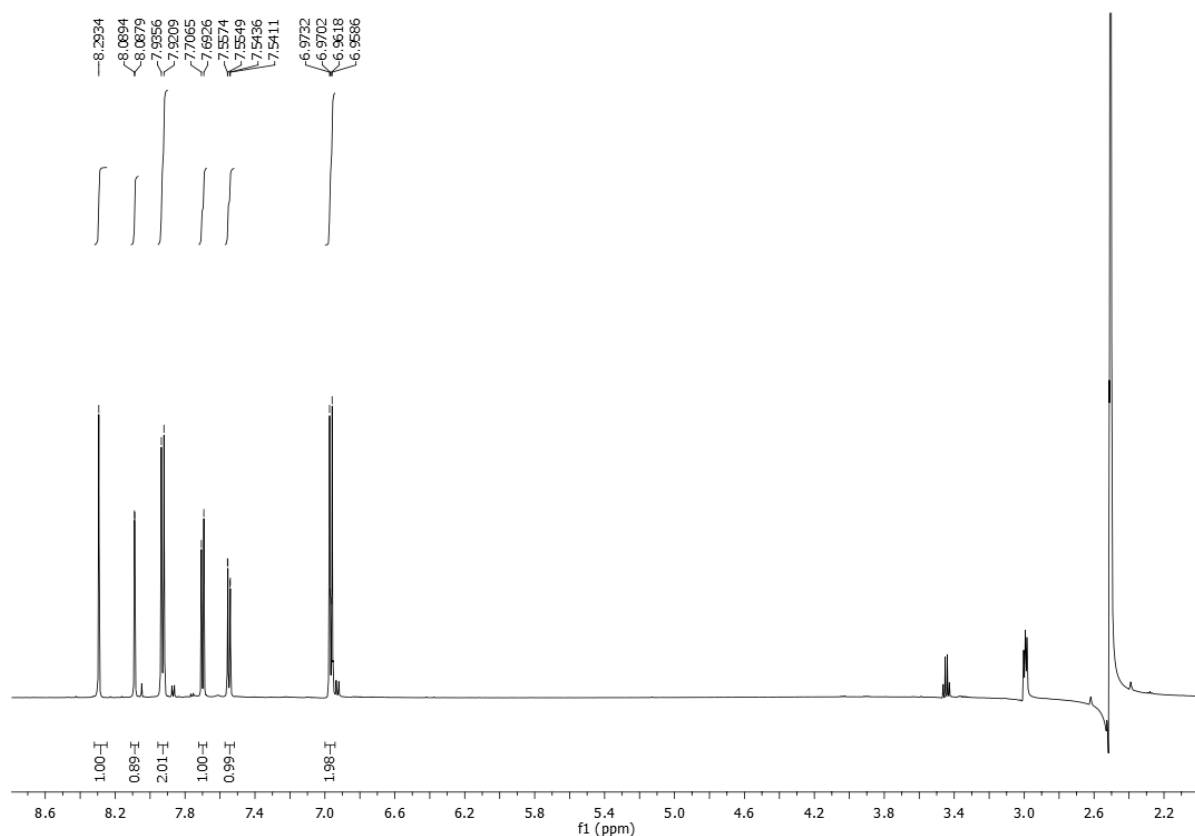

**Figure S22.**  $^{13}\text{C}$  NMR spectrum (DMSO- $d_6$ , 151 MHz) of *(E)*-2-(1-cyano-2-(4-hydroxyphenyl)vinyl)-1*H*-benzo[d]imidazole-5(6)-carbonitrile 27

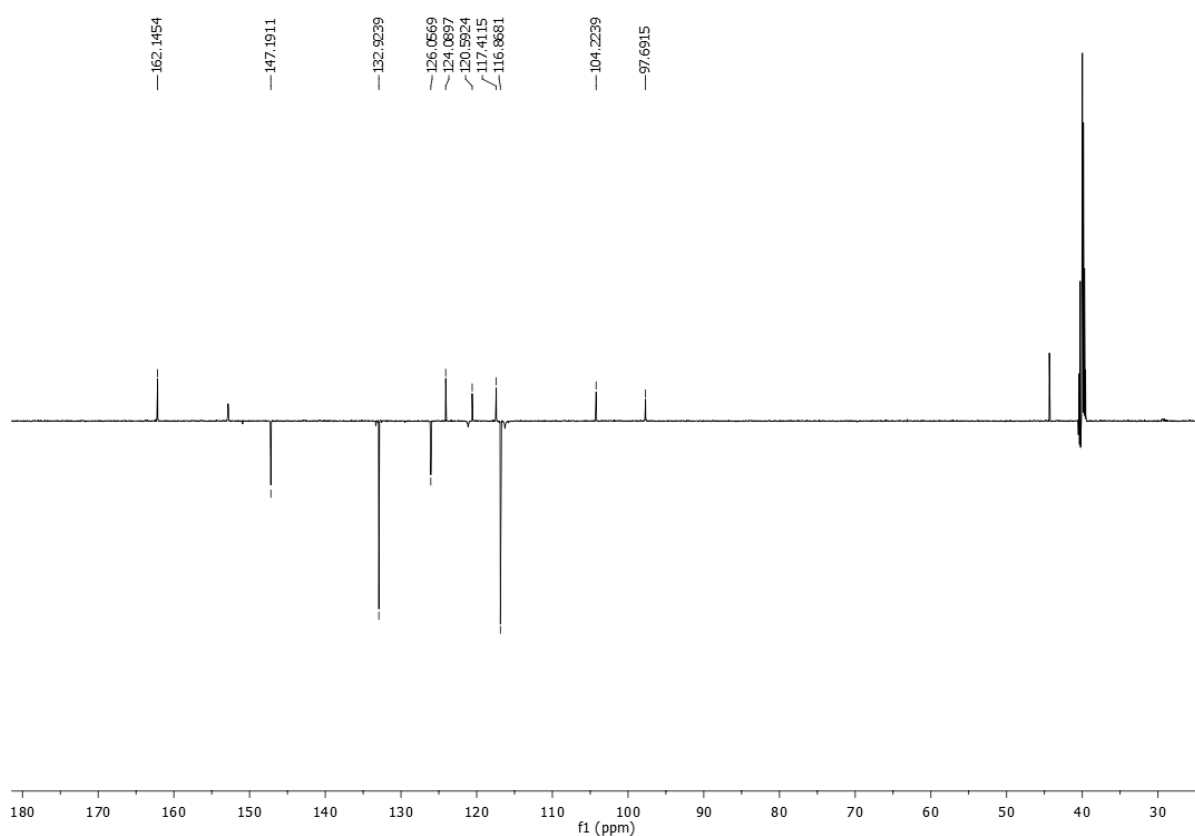

**Figure S23.**  $^1\text{H}$  NMR spectrum (DMSO- $d_6$ , 600 MHz) of *(E)*-2-(1-cyano-2-(3,4-dihydroxyphenyl)vinyl)-1H-benzo[d]imidazole-5(6)-carbonitrile 28

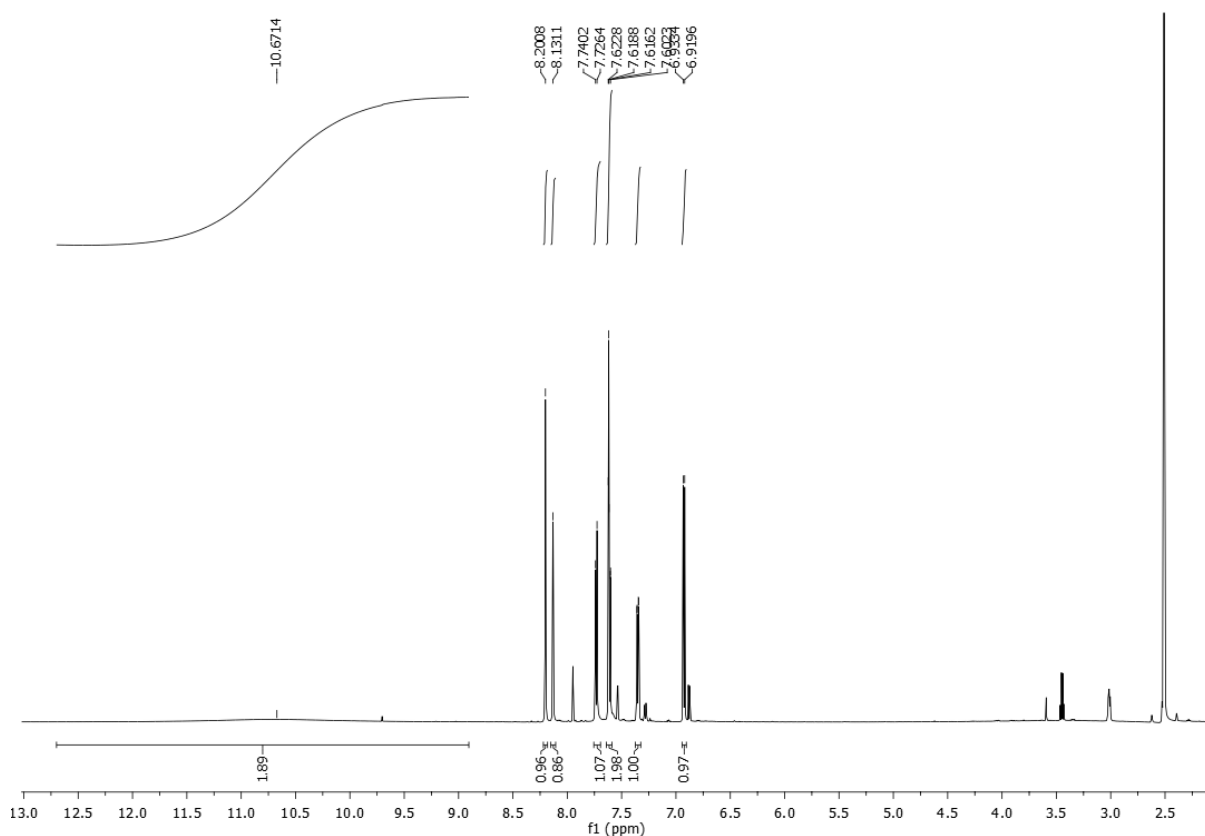

**Figure S24.**  $^{13}\text{C}$  NMR spectrum (DMSO- $d_6$ , 151 MHz) of *(E)*-2-(1-cyano-2-(3,4-dihydroxyphenyl)vinyl)-1H-benzo[d]imidazole-5(6)-carbonitrile 28

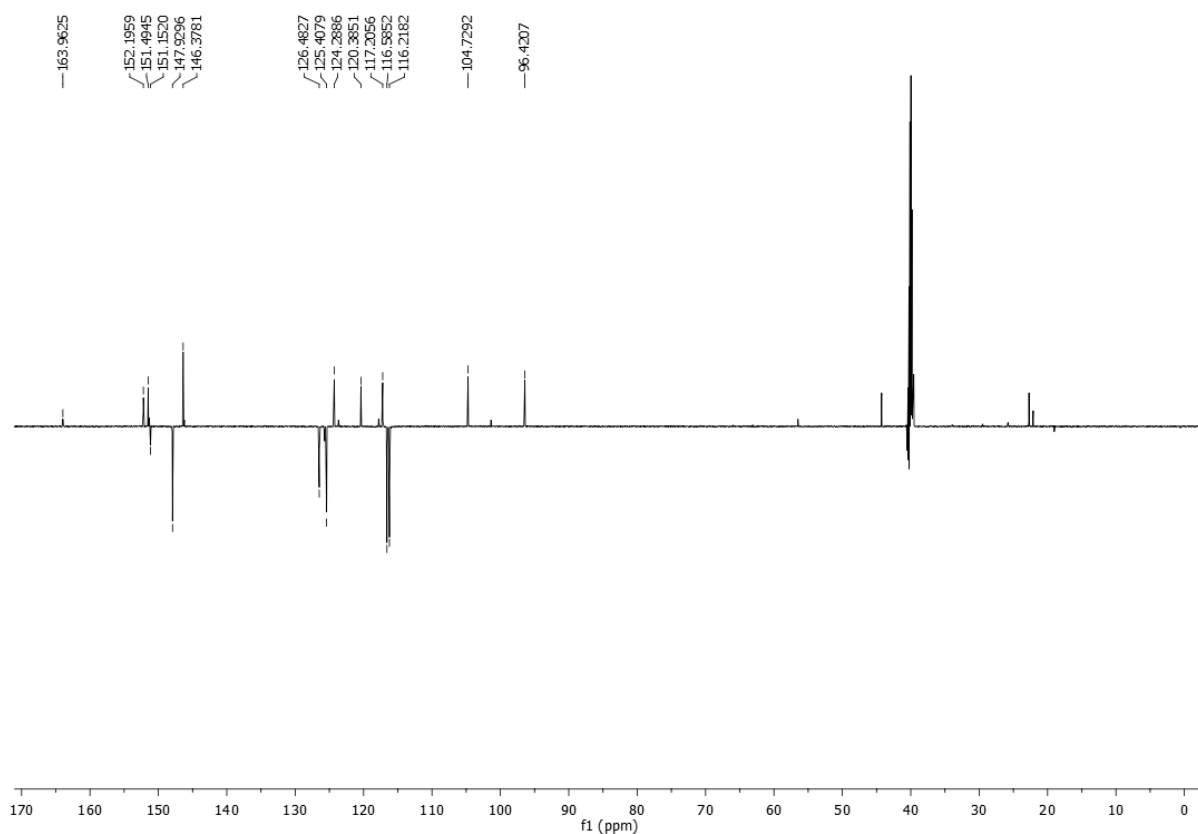

**Figure S25.**  $^1\text{H}$  NMR spectrum (DMSO- $d_6$ , 600 MHz) of *(E)*-2-(1-cyano-2-(3,4,5-trihydroxyphenyl)vinyl)-1H-benzo[d]imidazole-5(6)-carbonitrile 29

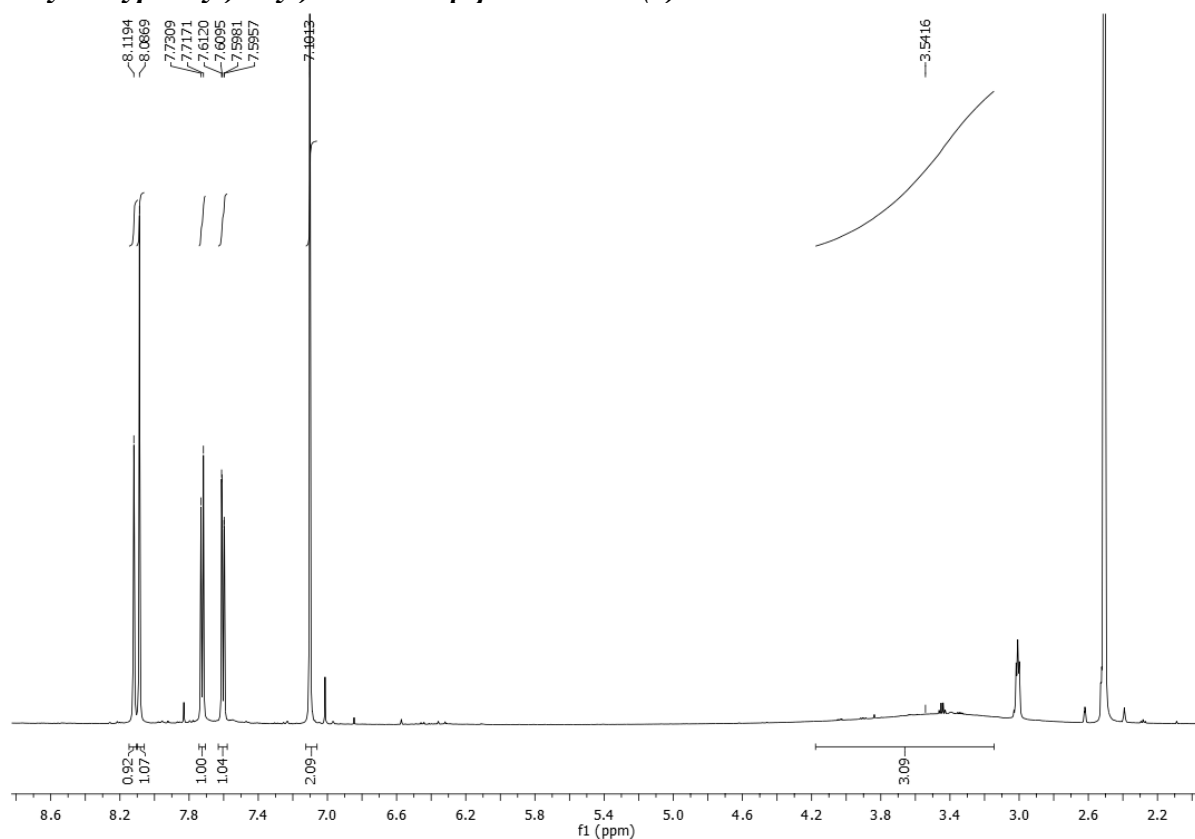

**Figure S26.**  $^{13}\text{C}$  NMR spectrum (DMSO- $d_6$ , 151 MHz) of *(E)*-2-(1-cyano-2-(3,4,5-trihydroxyphenyl)vinyl)-1H-benzo[d]imidazole-5(6)-carbonitrile 29

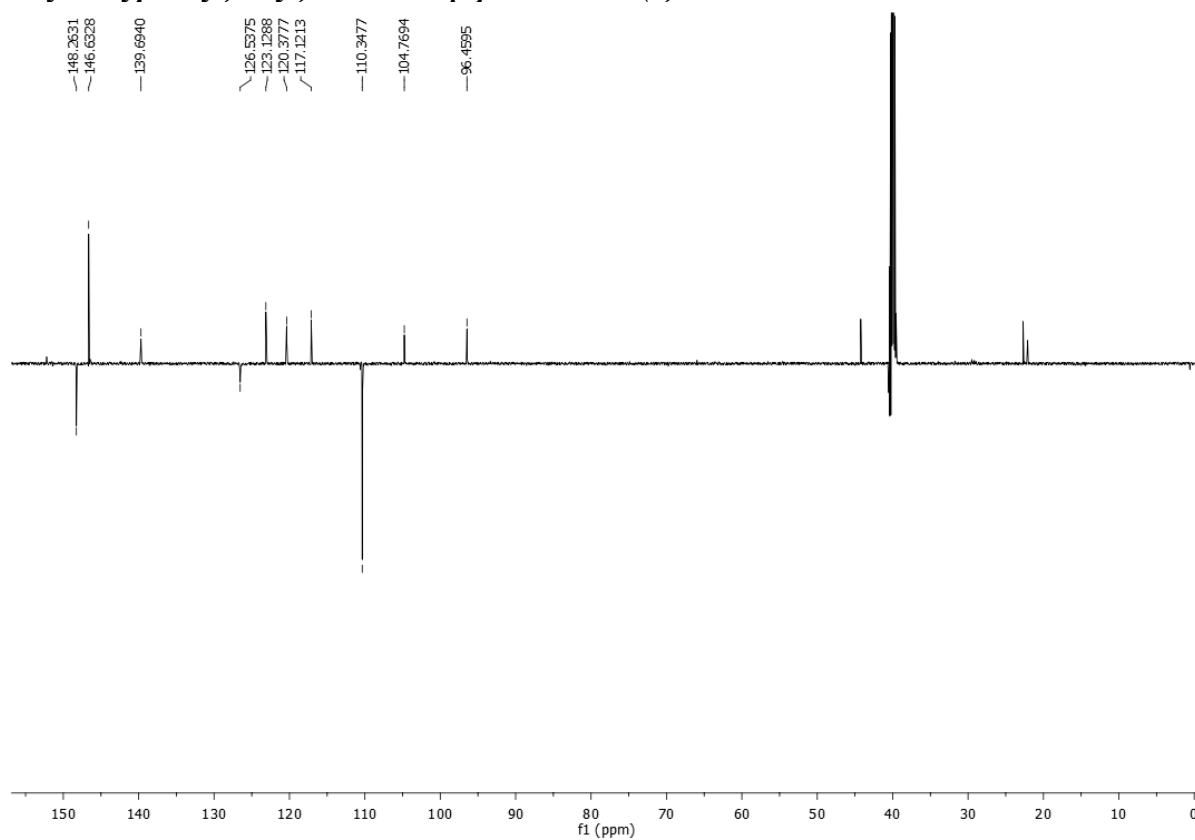

**Figure S27.**  $^1\text{H}$  NMR spectrum (DMSO- $d_6$ , 600 MHz) of *(E)*-3-(4-hydroxyphenyl)-2-(1-isobutyl-1H-benzo[d]imidazol-2-yl)acrylonitrile 30

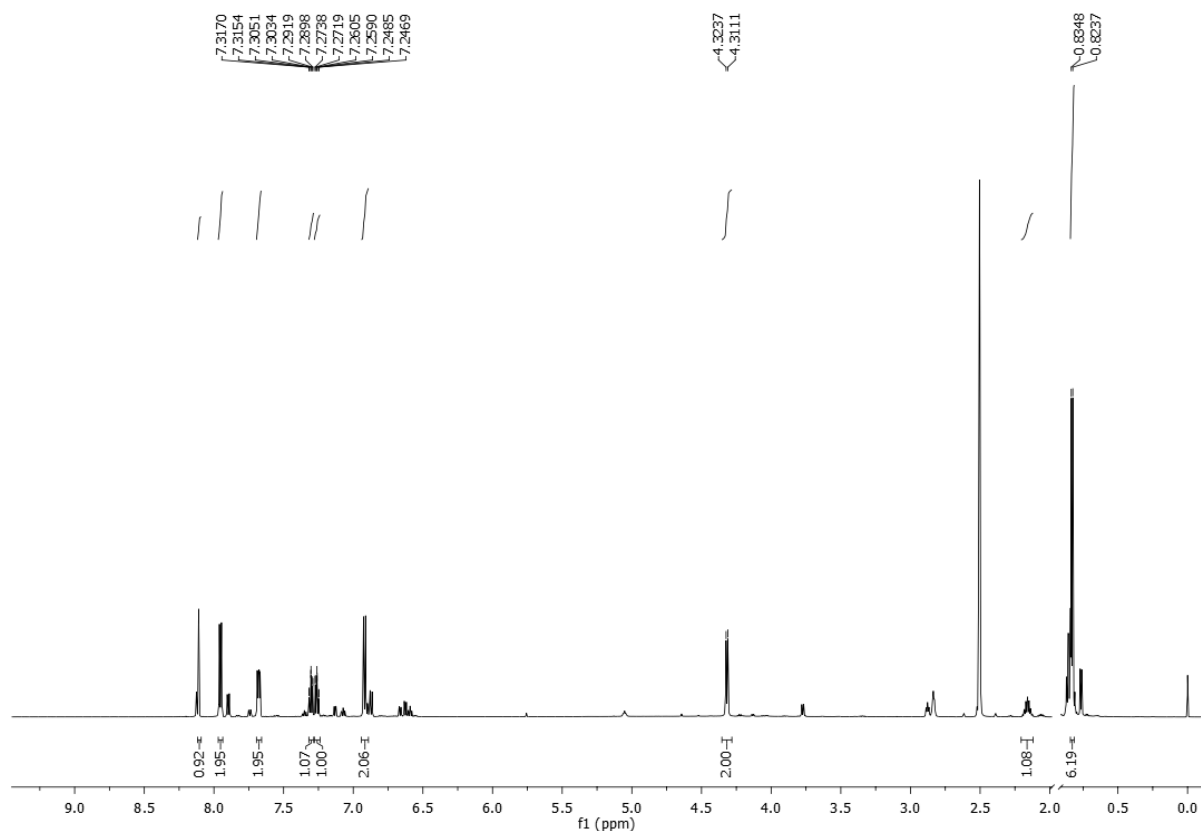

**Figure S28.**  $^{13}\text{C}$  NMR spectrum (DMSO- $d_6$ , 151 MHz) of *(E)*-3-(4-hydroxyphenyl)-2-(1-isobutyl-1H-benzo[d]imidazol-2-yl)acrylonitrile 30

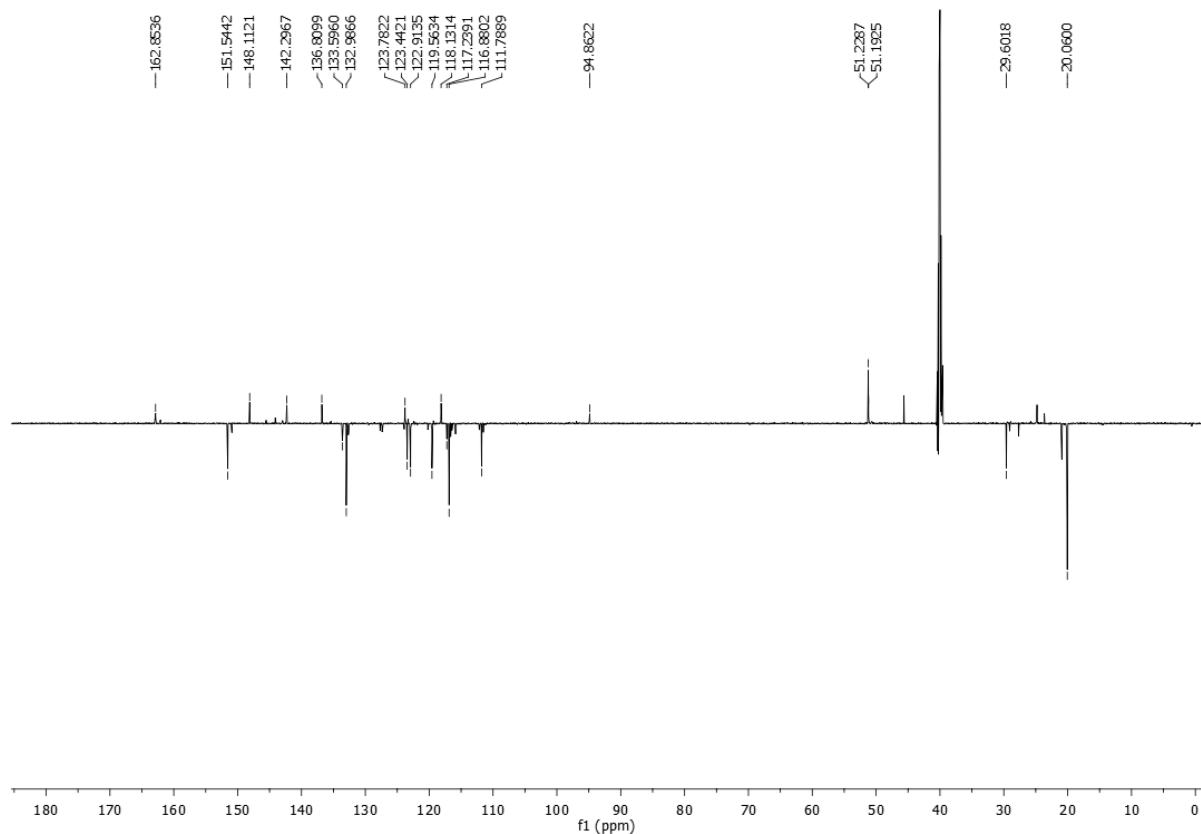

**Figure S29.**  $^1\text{H}$  NMR spectrum (DMSO- $d_6$ , 600 MHz) of *(E)*-3-(3,4-dihydroxyphenyl)-2-(1-isobutyl-1H-benzo[d]imidazol-2-yl)acrylonitrile 31

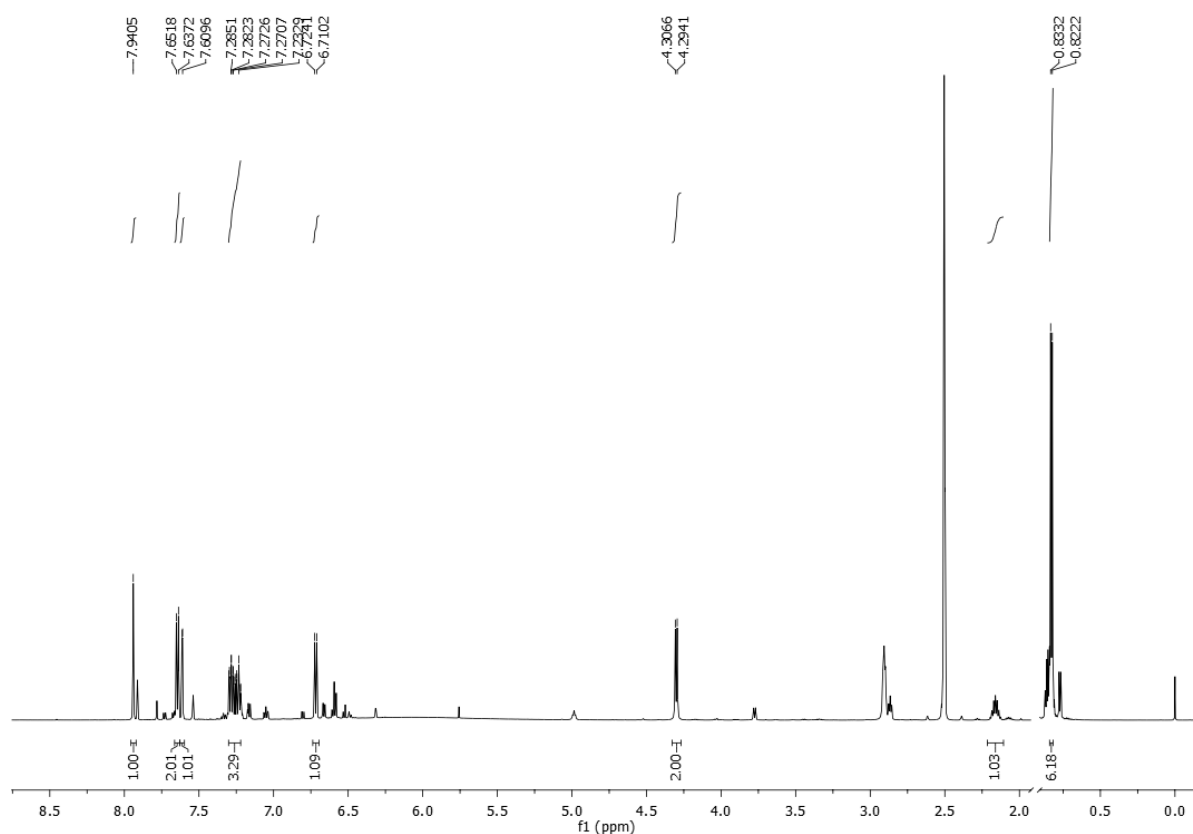

**Figure S30.**  $^{13}\text{C}$  NMR spectrum (DMSO- $d_6$ , 151 MHz) of *(E)*-3-(3,4-dihydroxyphenyl)-2-(1-isobutyl-1H-benzo[d]imidazol-2-yl)acrylonitrile 31

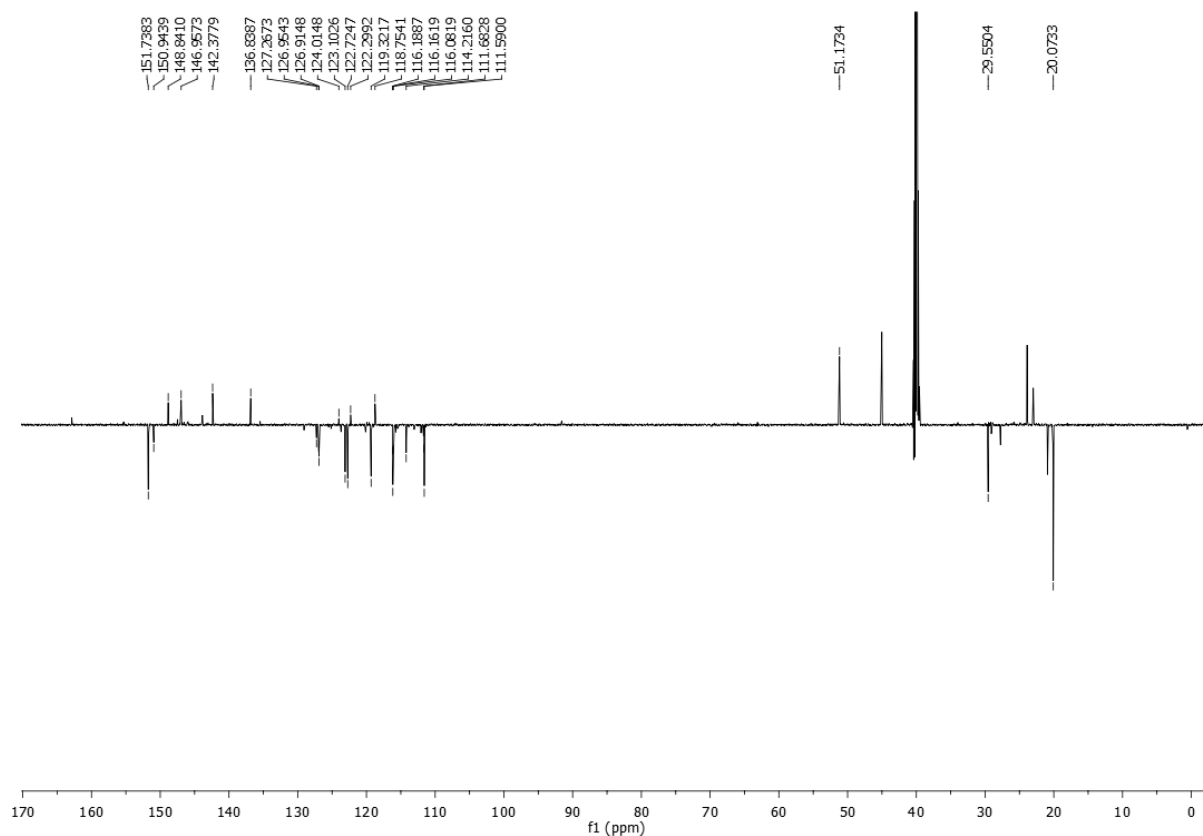



**Figure S31.**  $^1\text{H}$  NMR spectrum (DMSO- $d_6$ , 600 MHz) of *(E)*-2-(1-isobutyl-1H-benzo[d]imidazol-2-yl)-3-(3,4,5-trihydroxyphenyl)acrylonitrile 32

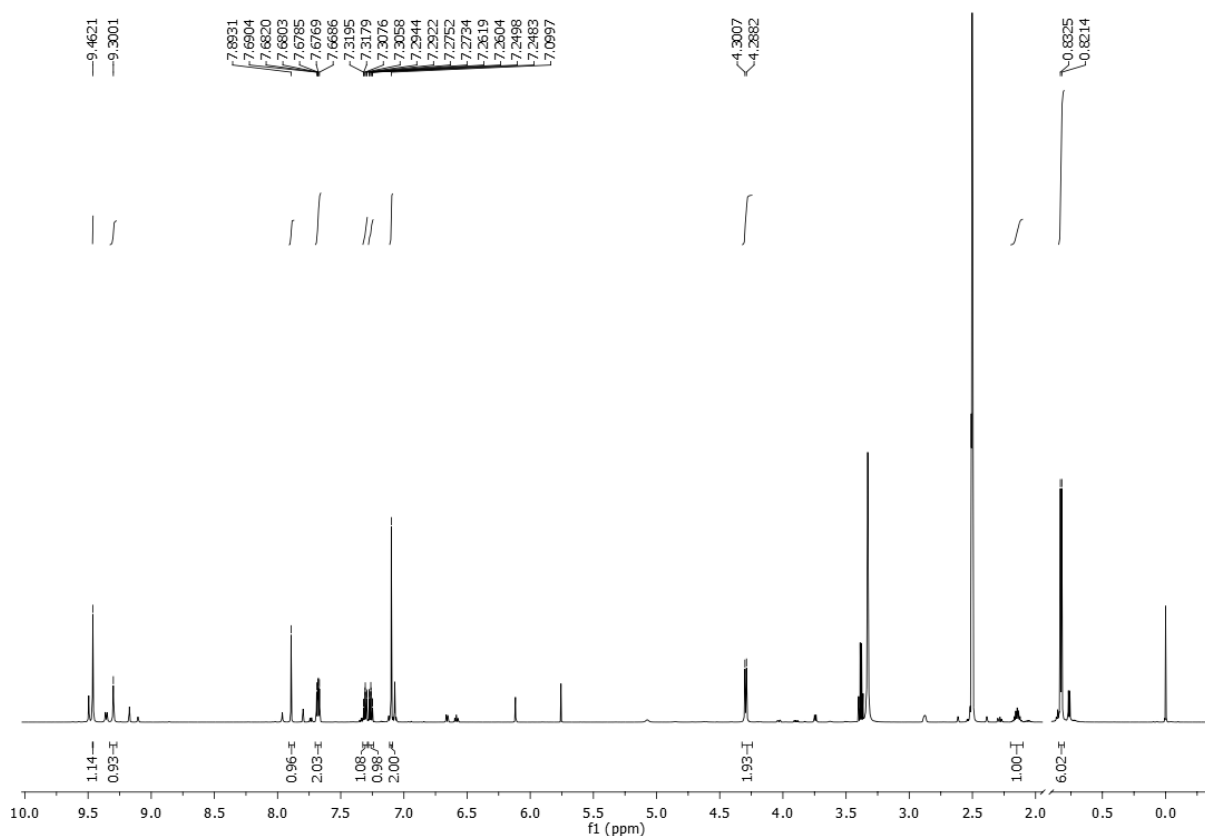

**Figure S32.**  $^{13}\text{C}$  NMR spectrum (DMSO- $d_6$ , 151 MHz) of *(E)*-2-(1-isobutyl-1H-benzo[d]imidazol-2-yl)-3-(3,4,5-trihydroxyphenyl)acrylonitrile 32

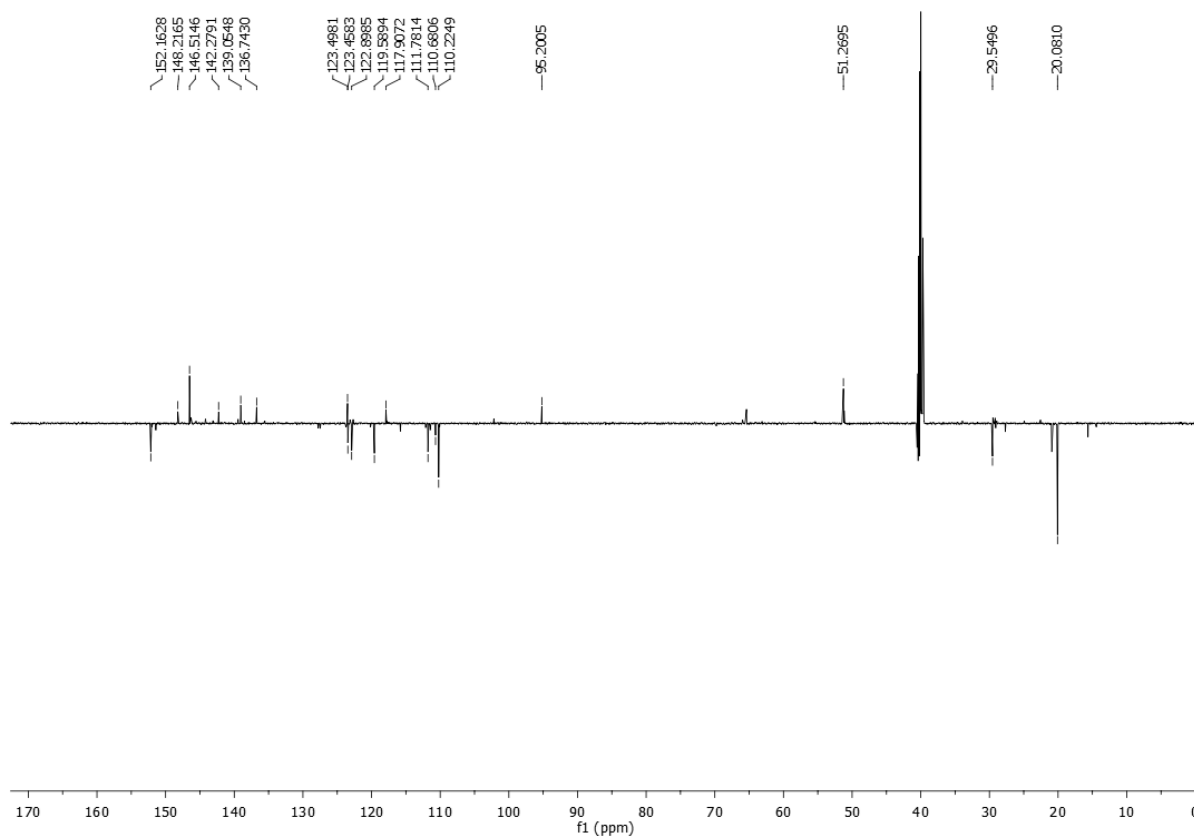

**Figure S33.**  $^1\text{H}$  NMR spectrum ( $\text{DMSO-}d_6$ , 600 MHz) of *(E)*-2-(1-cyano-2-(4-hydroxyphenyl)vinyl)-1-isobutyl-1H-benzo[d]imidazole-6-carbonitrile **33**

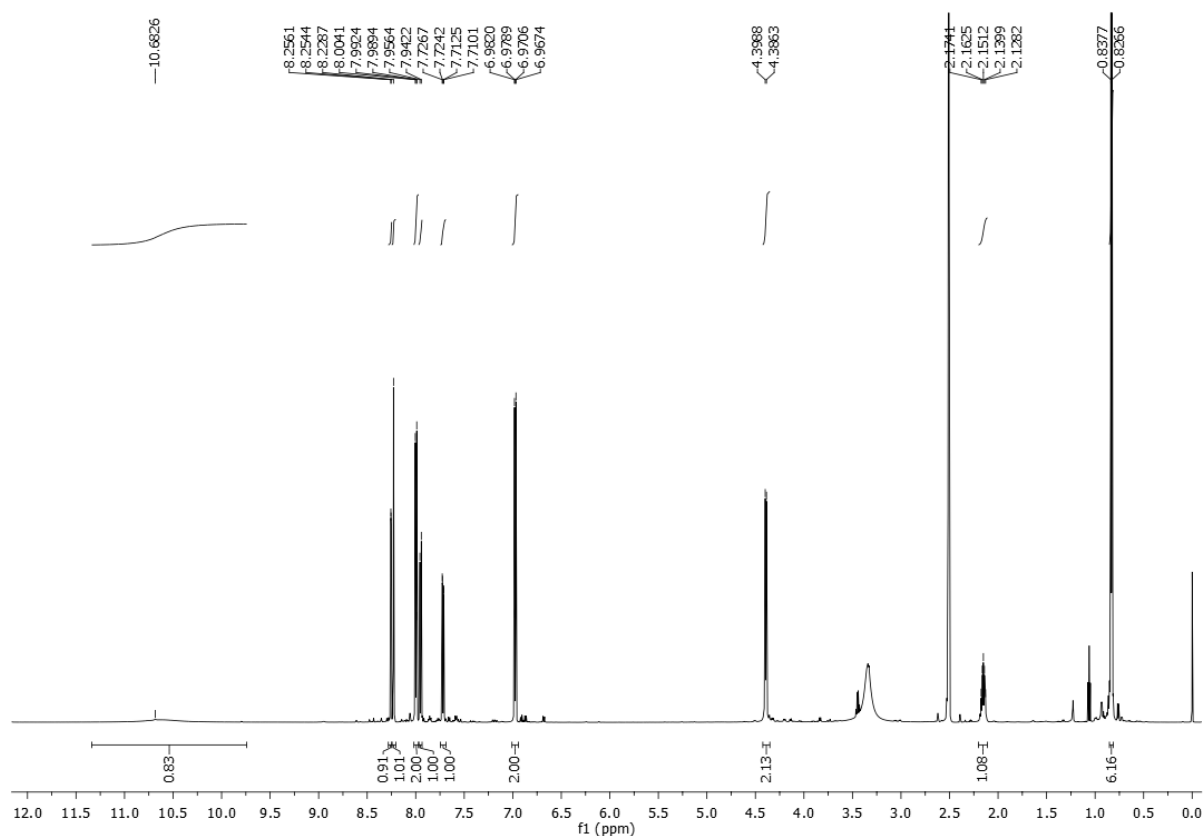

**Figure S34.**  $^{13}\text{C}$  NMR spectrum ( $\text{DMSO-}d_6$ , 151 MHz) of *(E)*-2-(1-cyano-2-(4-hydroxyphenyl)vinyl)-1-isobutyl-1H-benzo[d]imidazole-6-carbonitrile **33**

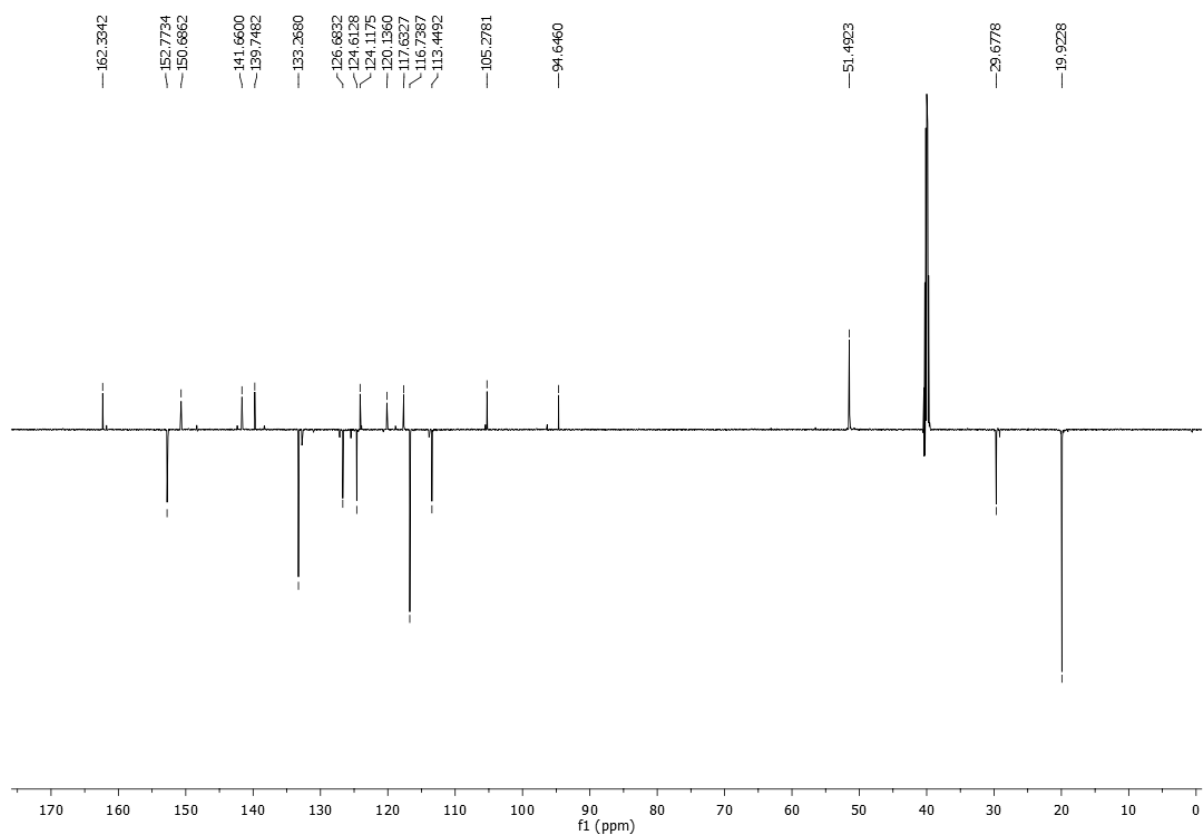

**Figure S35.**  $^1\text{H}$  NMR spectrum (DMSO- $d_6$ , 600 MHz) of *(E)*-2-(1-cyano-2-(3,4-dihydroxyphenyl)vinyl)-1-isobutyl-1H-benzod[*d*]imidazole-6-carbonitrile 34

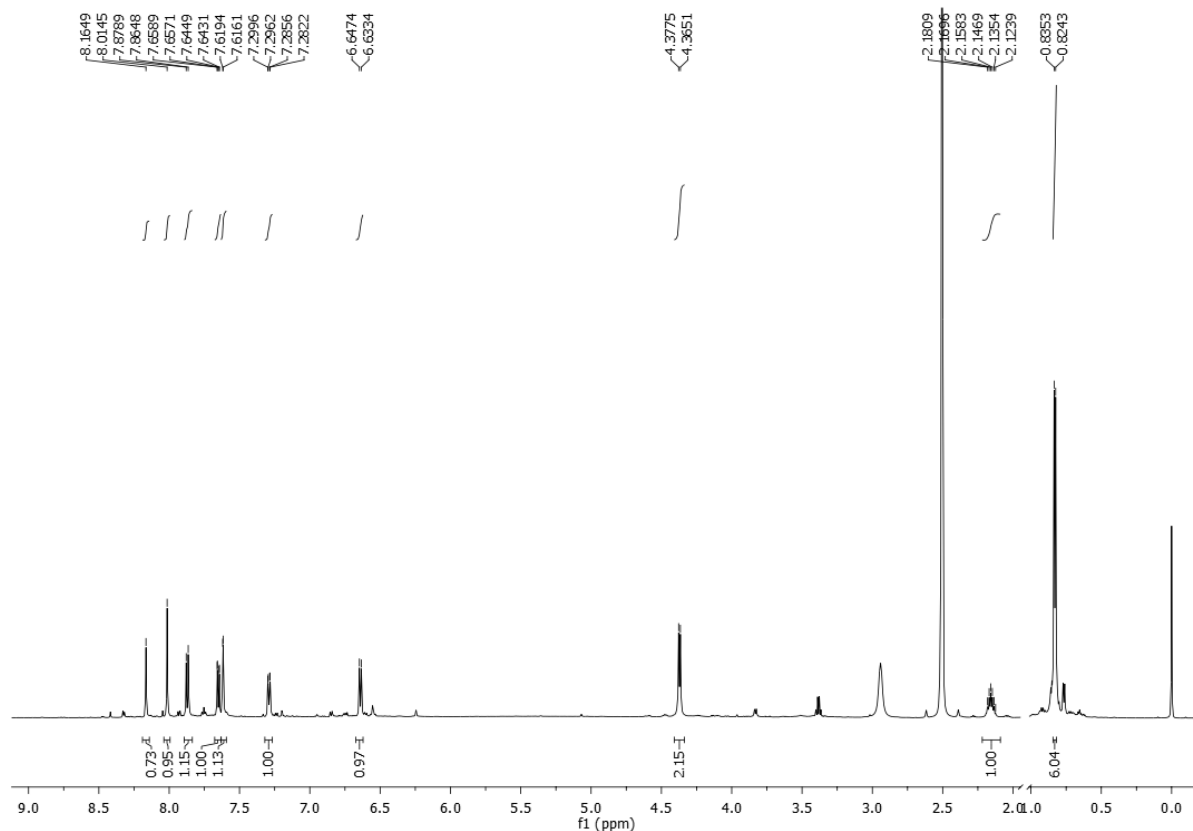

**Figure S36.**  $^{13}\text{C}$  NMR spectrum (DMSO- $d_6$ , 151 MHz) of *(E)*-2-(1-cyano-2-(3,4-dihydroxyphenyl)vinyl)-1-isobutyl-1H-benzod[*d*]imidazole-6-carbonitrile 34

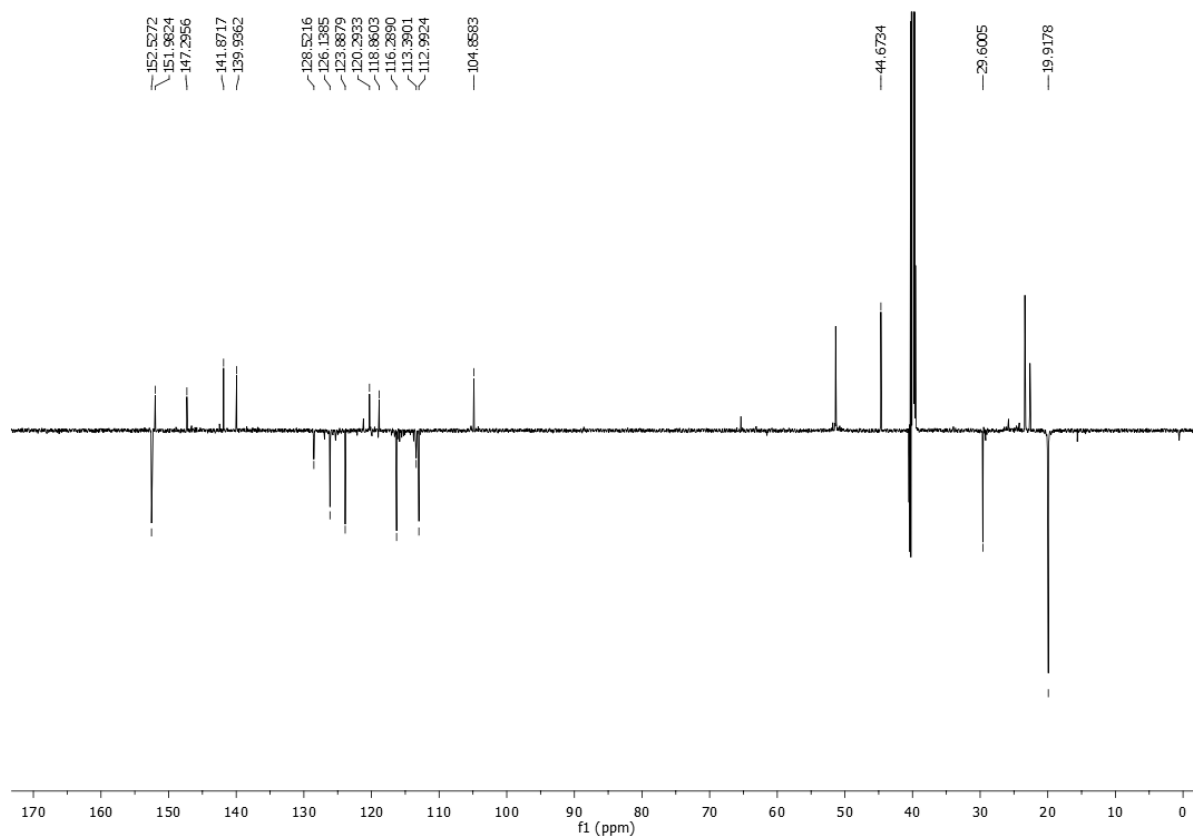

**Figure S37.**  $^1\text{H}$  NMR spectrum (DMSO- $d_6$ , 600 MHz) of *(E)*-2-(1-cyano-2-(3,4,5-trihydroxyphenyl)vinyl)-1-isobutyl-1H-benzo[d]imidazole-6-carbonitrile 35

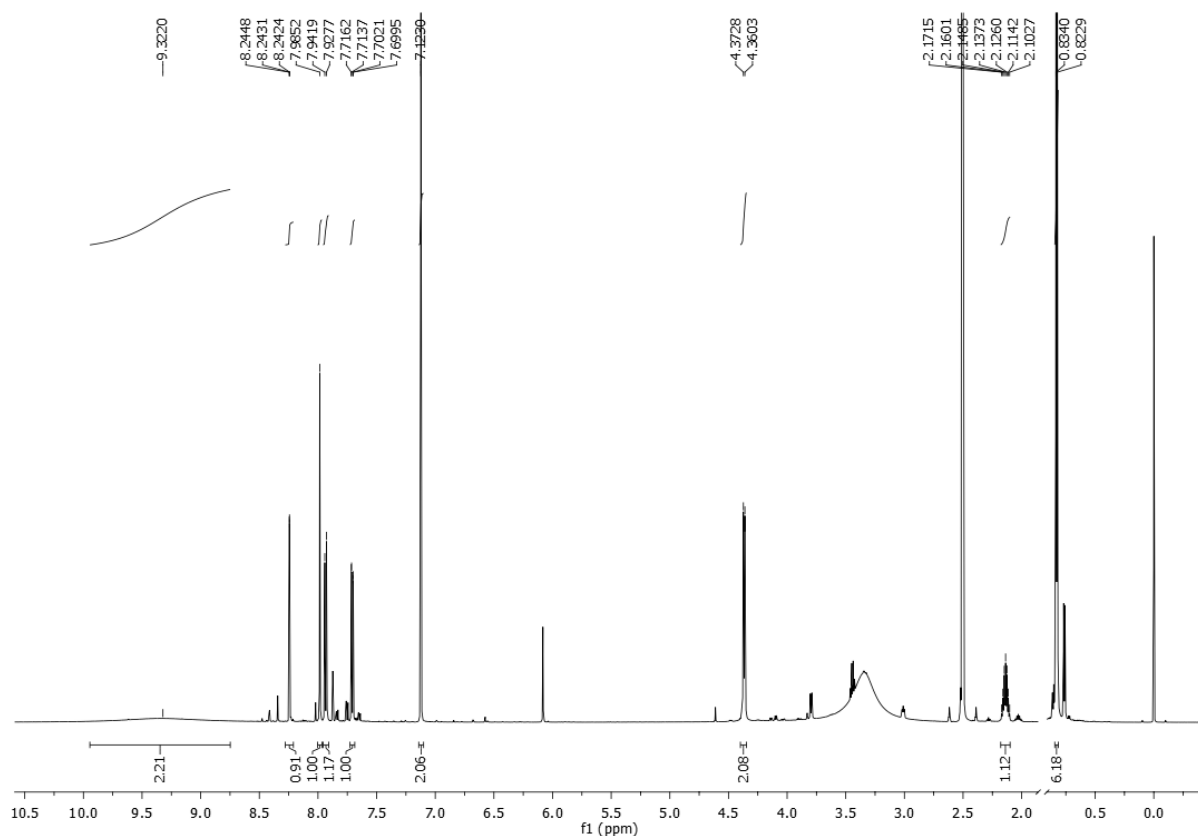

**Figure S38.**  $^{13}\text{C}$  NMR spectrum (DMSO- $d_6$ , 151 MHz) of *(E)*-2-(1-cyano-2-(3,4,5-trihydroxyphenyl)vinyl)-1-isobutyl-1H-benzo[d]imidazole-6-carbonitrile 35

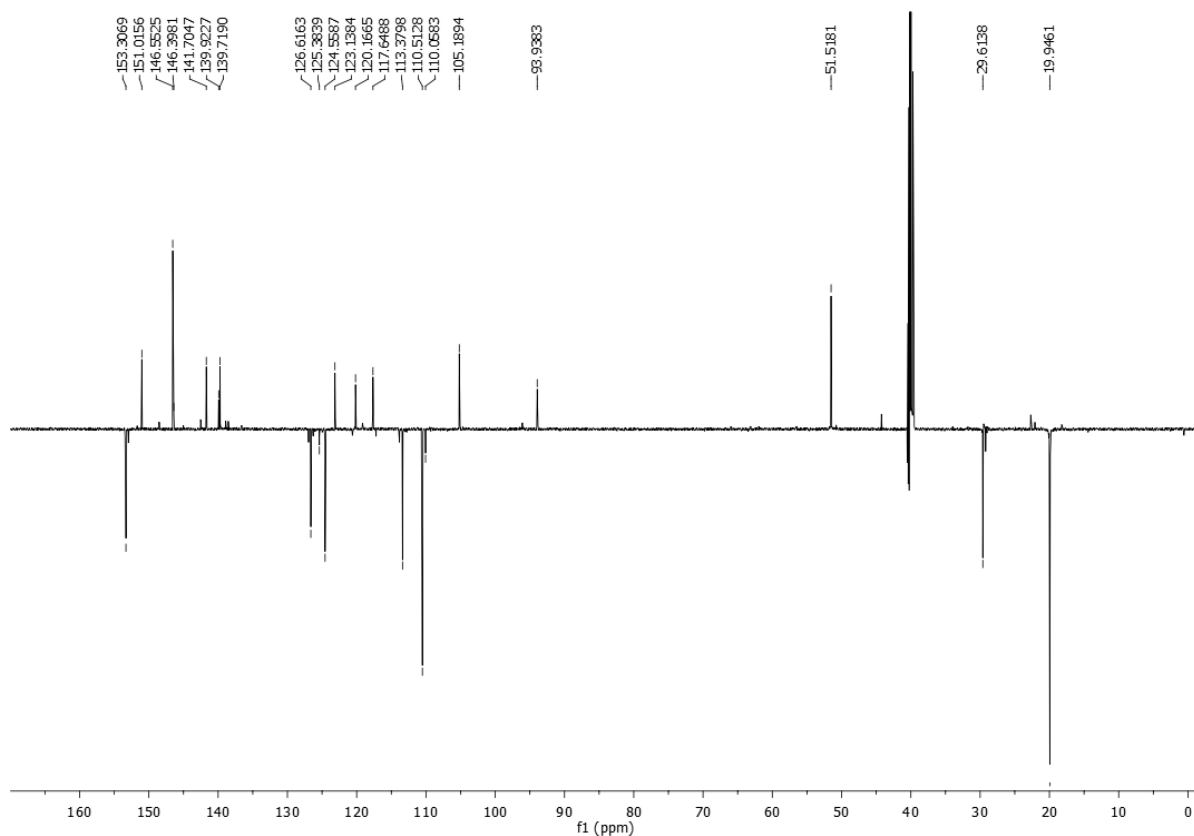

**Figure S39.**  $^1\text{H}$  NMR spectrum (DMSO- $d_6$ , 600 MHz) of *(E)*-3-(4-hydroxyphenyl)-2-(1-methyl-1H-benzo[d]imidazol-2-yl)acrylonitrile 36

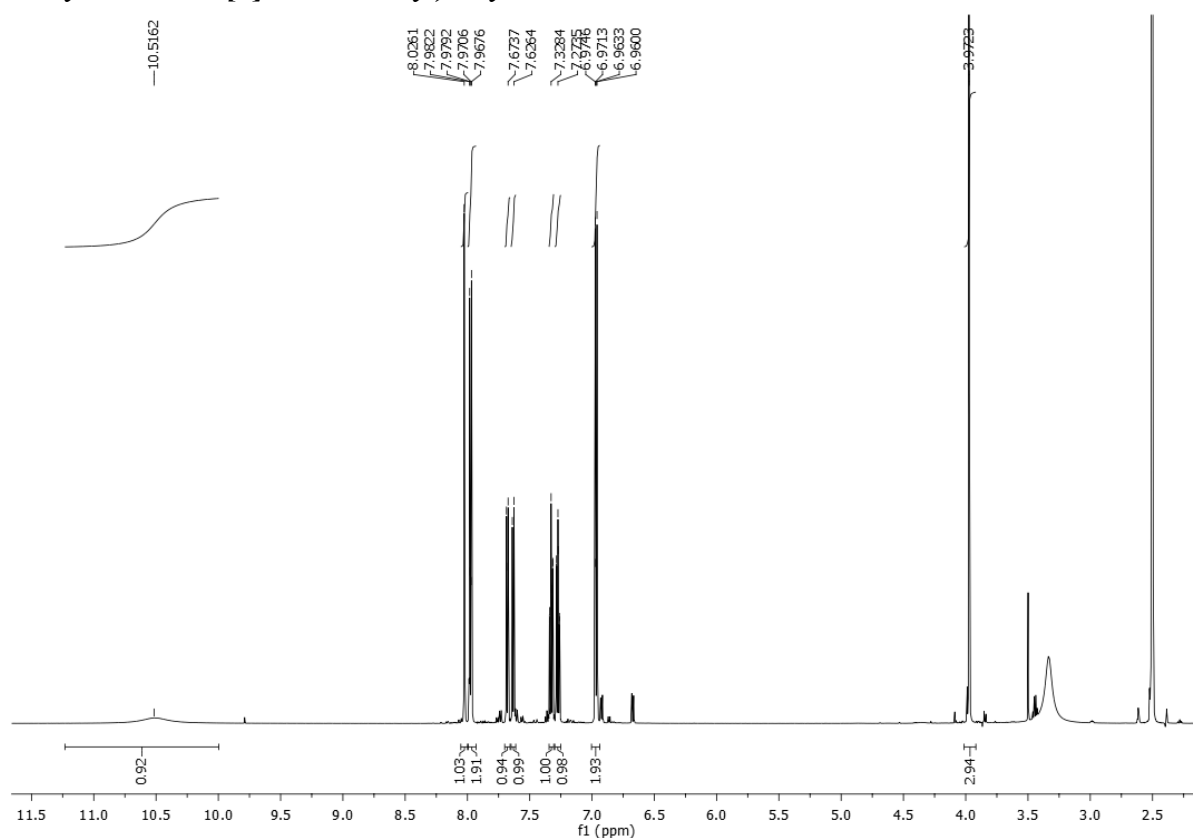

**Figure S40.**  $^{13}\text{C}$  NMR spectrum (DMSO- $d_6$ , 151 MHz) of *(E)*-3-(4-hydroxyphenyl)-2-(1-methyl-1H-benzo[d]imidazol-2-yl)acrylonitrile 36

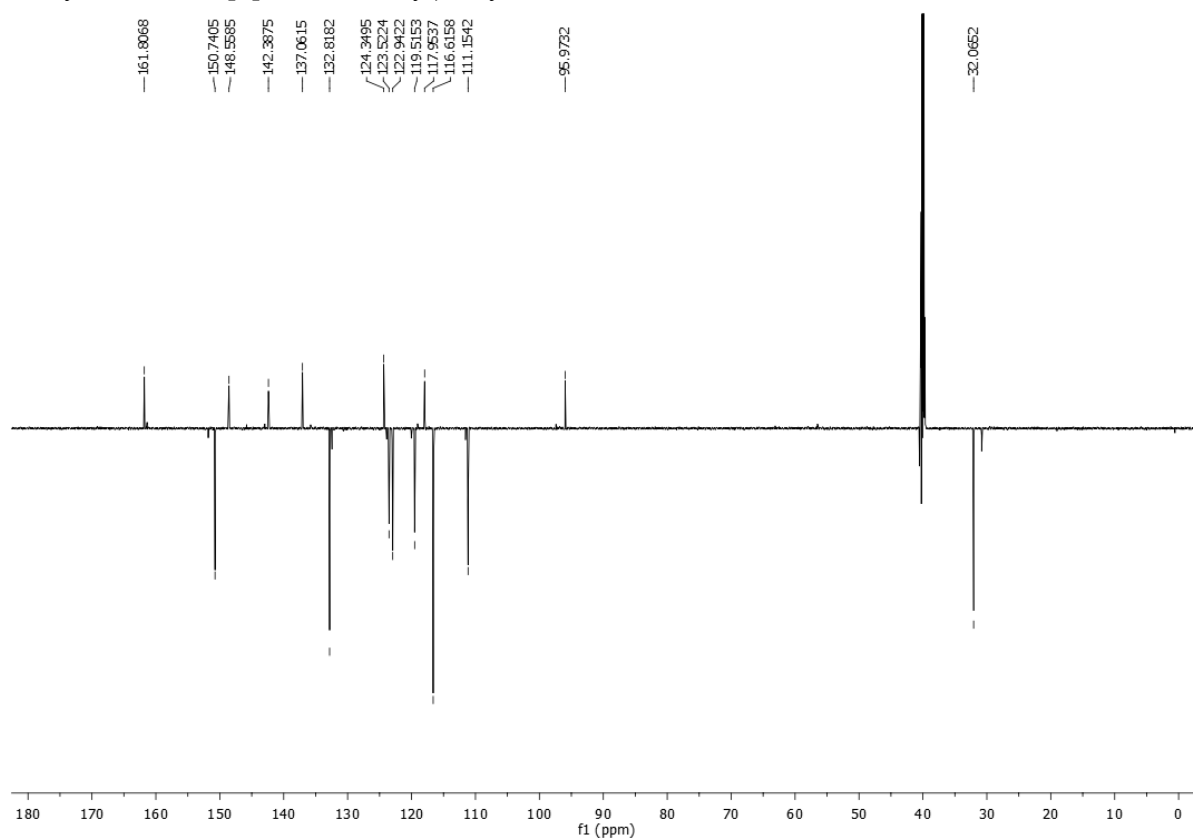

**Figure S41.**  $^1\text{H}$  NMR spectrum (DMSO- $d_6$ , 600 MHz) of *(E)*-3-(3,4-dihydroxyphenyl)-2-(1-methyl-1H-benzo[d]imidazol-2-yl)acrylonitrile 37

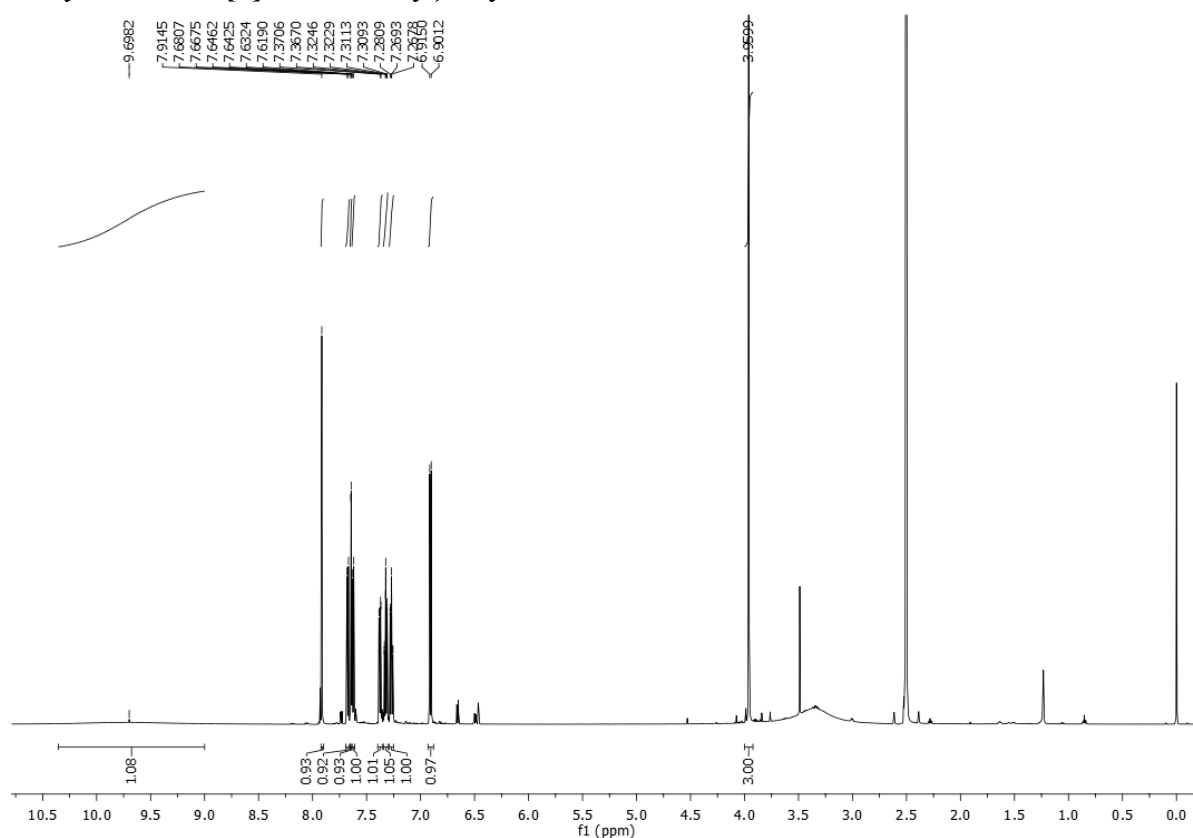

**Figure S42.**  $^{13}\text{C}$  NMR spectrum (DMSO- $d_6$ , 151 MHz) of *(E)*-3-(3,4-dihydroxyphenyl)-2-(1-methyl-1H-benzo[d]imidazol-2-yl)acrylonitrile 37

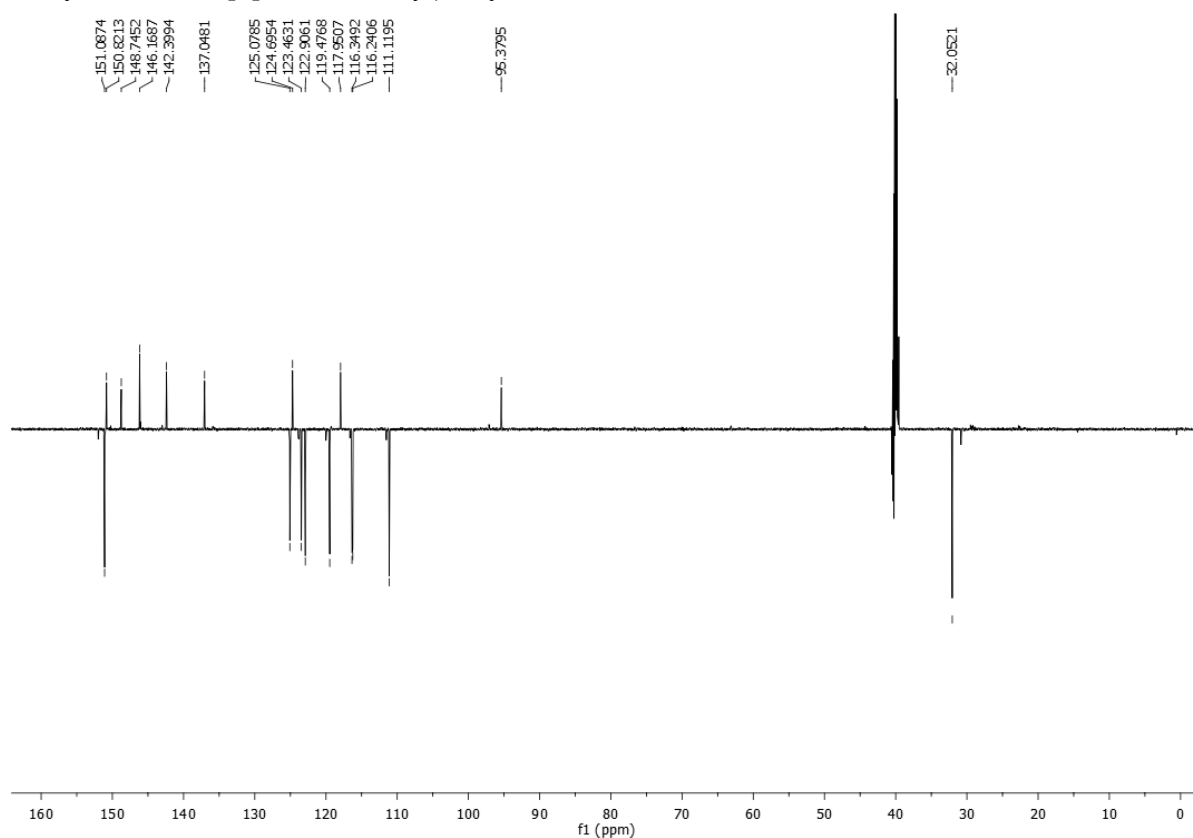

**Figure S43.**  $^1\text{H}$  NMR spectrum (DMSO- $d_6$ , 600 MHz) of *(E)*-2-(1-methyl-1H-benzof[d]imidazol-2-yl)-3-(3,4,5-trihydroxyphenyl)acrylonitrile **38**

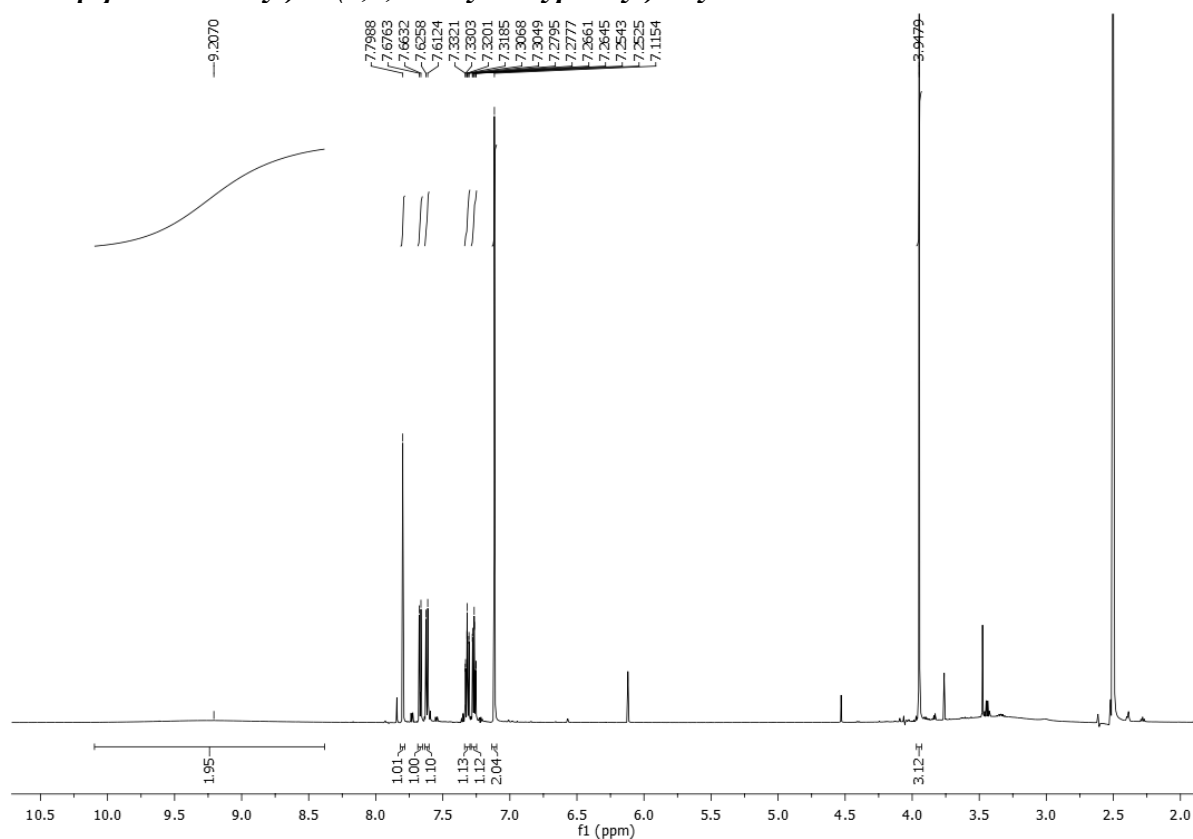

**Figure S44.**  $^{13}\text{C}$  NMR spectrum (DMSO- $d_6$ , 151 MHz) of *(E)*-2-(1-methyl-1H-benzof[d]imidazol-2-yl)-3-(3,4,5-trihydroxyphenyl)acrylonitrile **38**

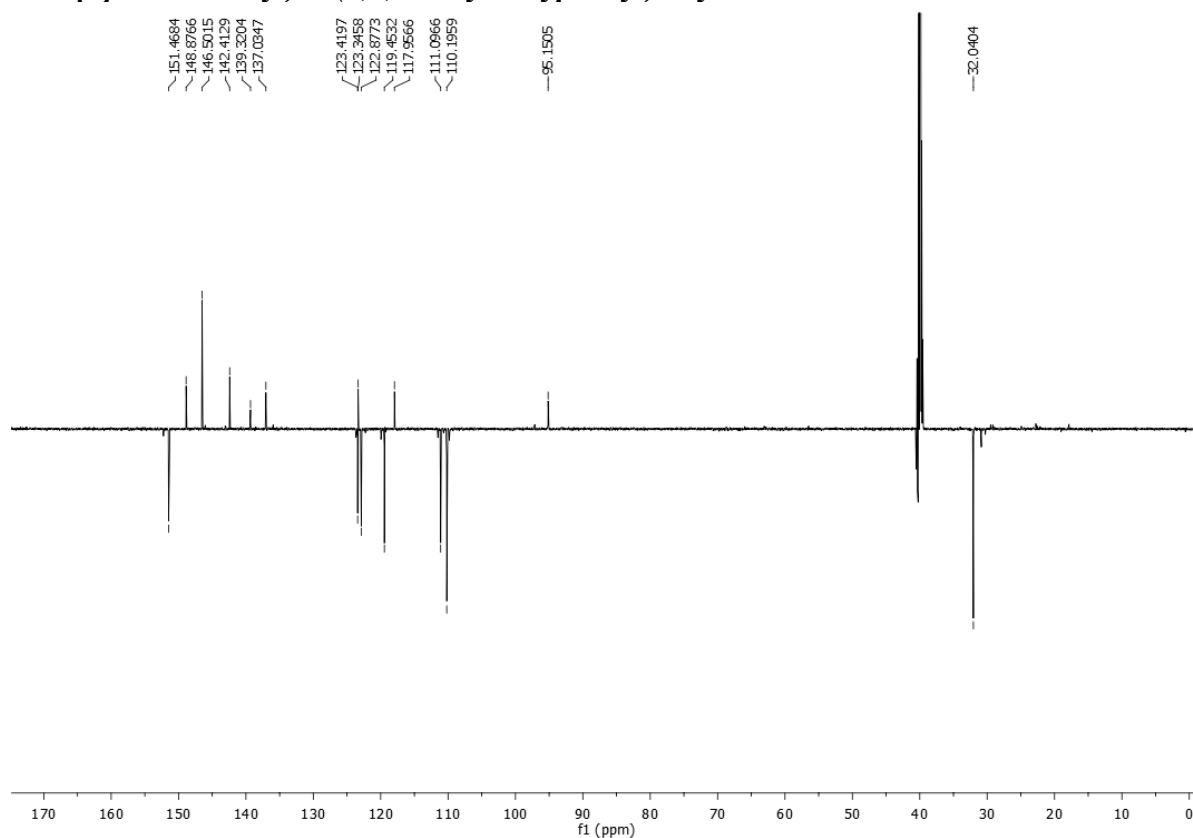

**Figure S45.**  $^1\text{H}$  NMR spectrum (DMSO- $d_6$ , 600 MHz) of *(E)*-2-(1-cyano-2-(4-hydroxyphenyl)vinyl)-1-methyl-1H-benzo[d]imidazole-6-carbonitrile **39**

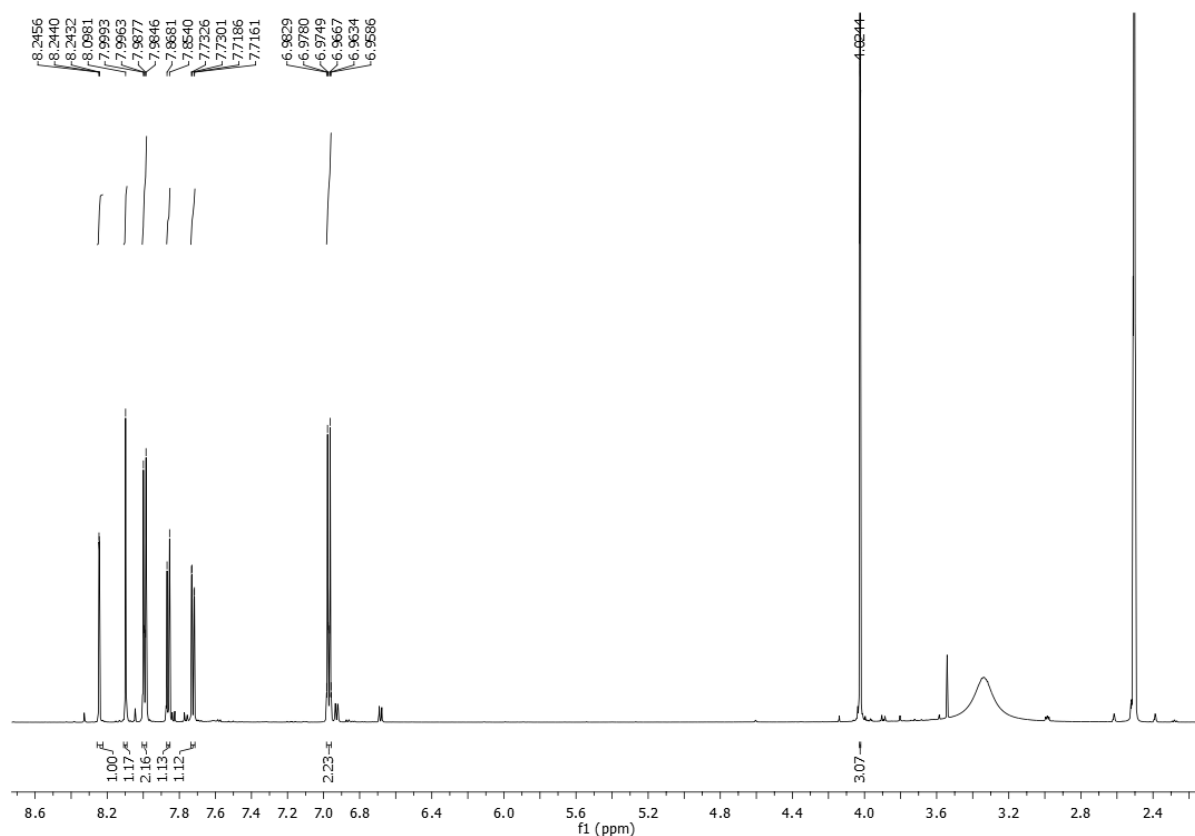

**Figure S46.**  $^{13}\text{C}$  NMR spectrum (DMSO- $d_6$ , 151 MHz) of *(E)*-2-(1-cyano-2-(4-hydroxyphenyl)vinyl)-1-methyl-1H-benzo[d]imidazole-6-carbonitrile **39**

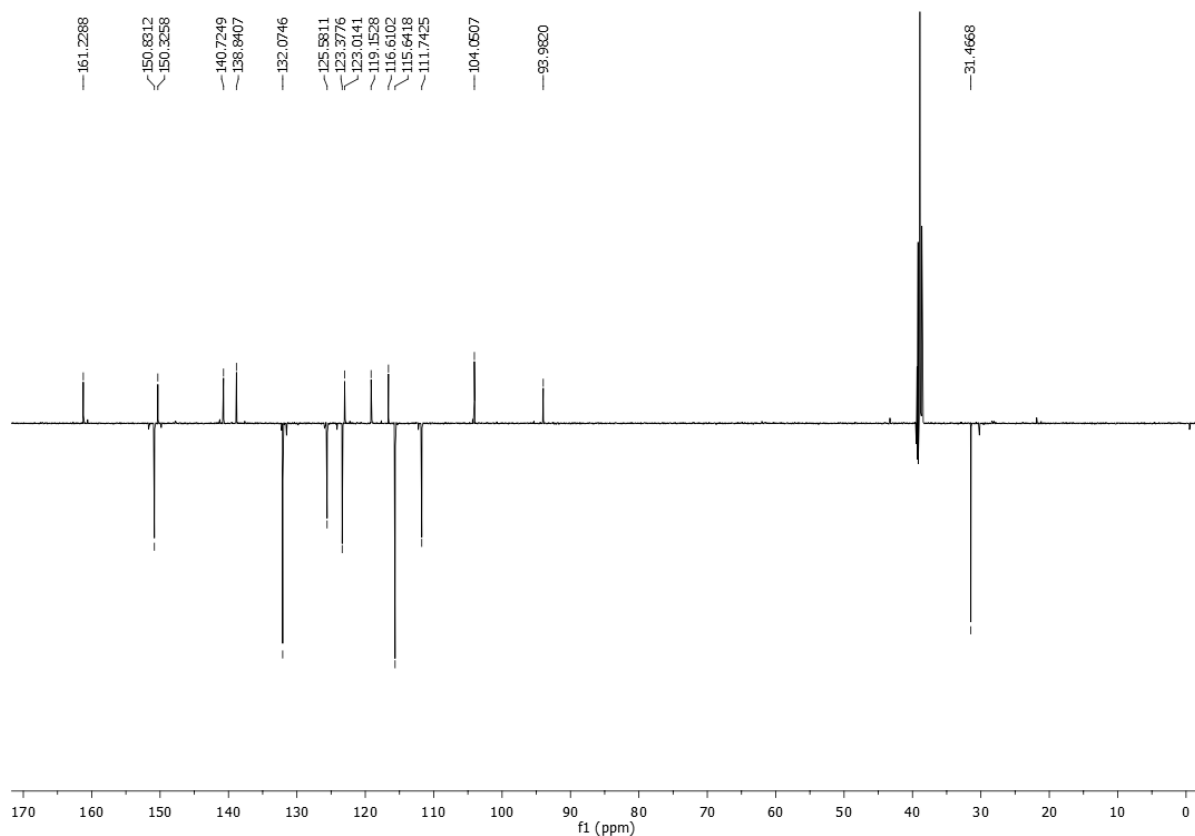



**Figure S47.**  $^1\text{H}$  NMR spectrum (DMSO- $d_6$ , 600 MHz) of *(E)*-2-(1-cyano-2-(3,4-dihydroxyphenyl)vinyl)-1-methyl-1H-benzo[d]imidazole-6-carbonitrile 40

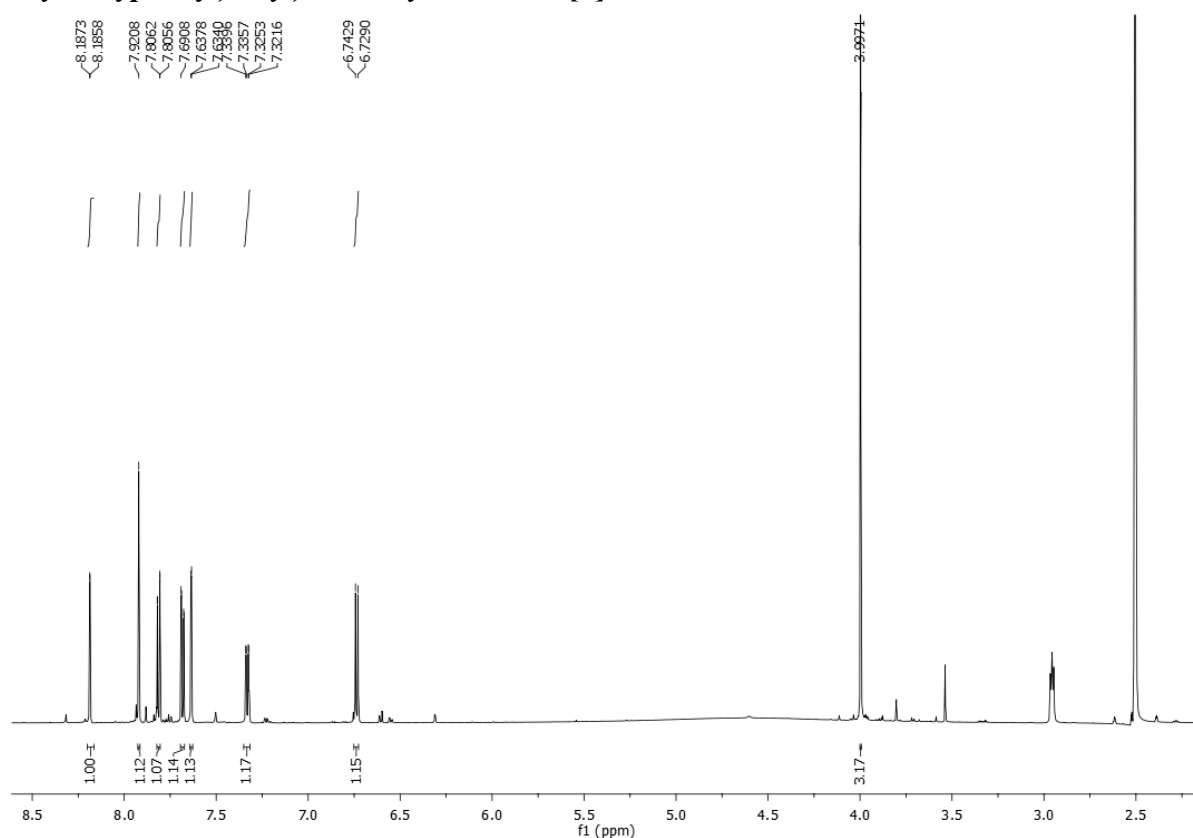

**Figure S48.**  $^{13}\text{C}$  NMR spectrum (DMSO- $d_6$ , 151 MHz) of *(E)*-2-(1-cyano-2-(3,4-dihydroxyphenyl)vinyl)-1-methyl-1H-benzo[d]imidazole-6-carbonitrile 40

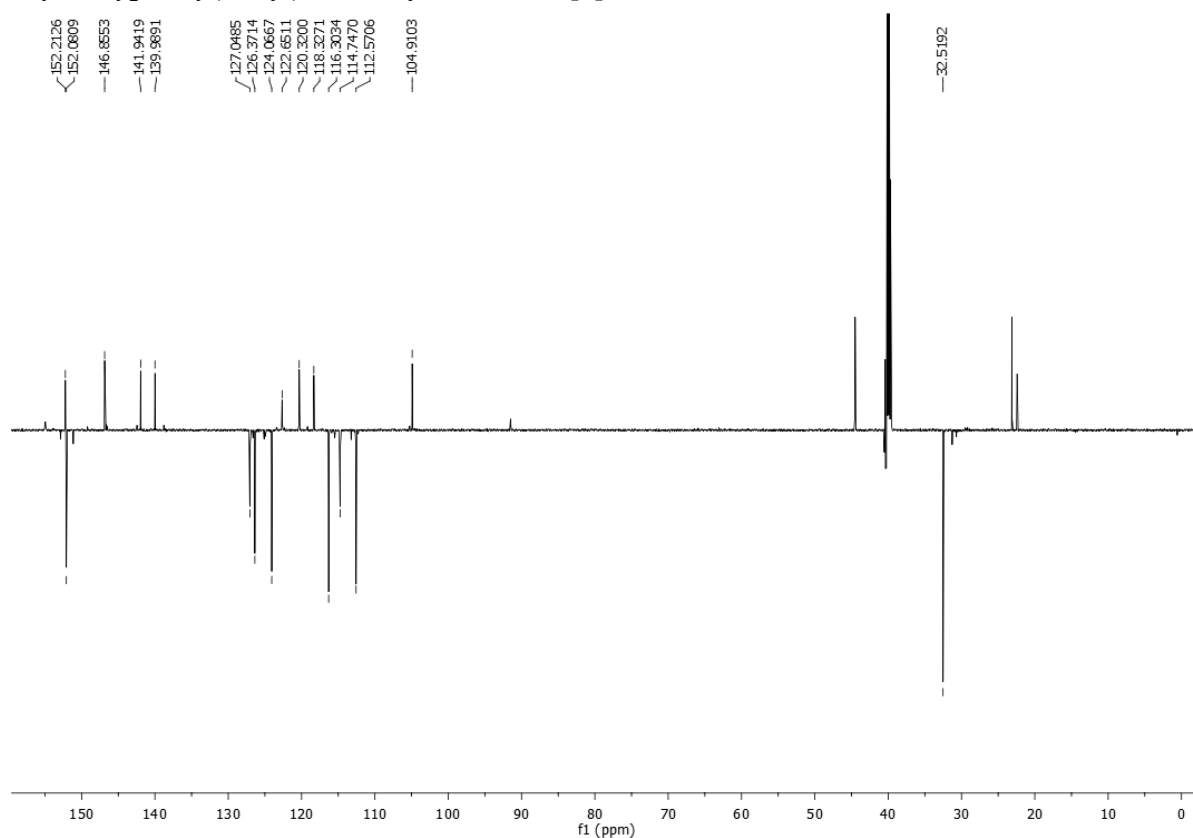

**Figure S49.**  $^1\text{H}$  NMR spectrum (DMSO- $d_6$ , 600 MHz) of *(E)*-2-(1-cyano-2-(3,4,5-trihydroxyphenyl)vinyl)-1-methyl-1H-benzo[d]imidazole-6-carbonitrile 41

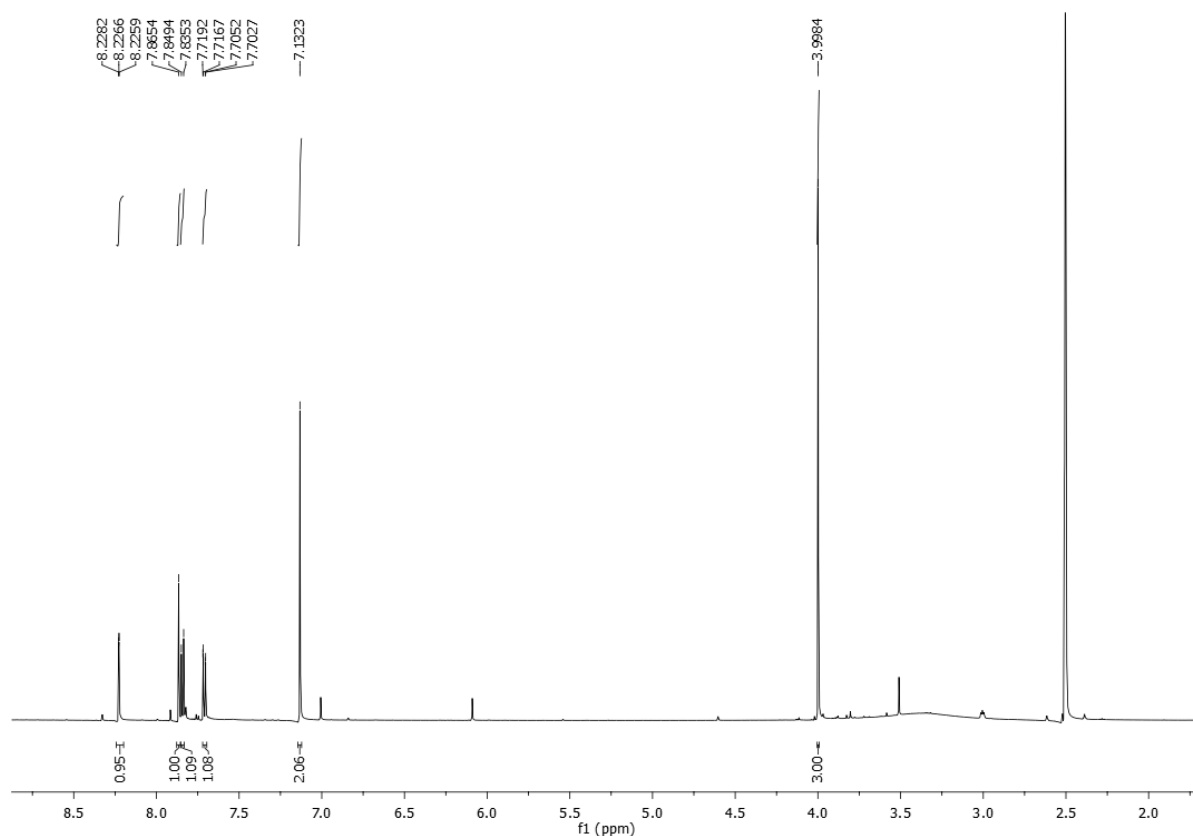

**Figure S50.**  $^{13}\text{C}$  NMR spectrum (DMSO- $d_6$ , 151 MHz) of *(E)*-2-(1-cyano-2-(3,4,5-trihydroxyphenyl)vinyl)-1-methyl-1H-benzo[d]imidazole-6-carbonitrile 41

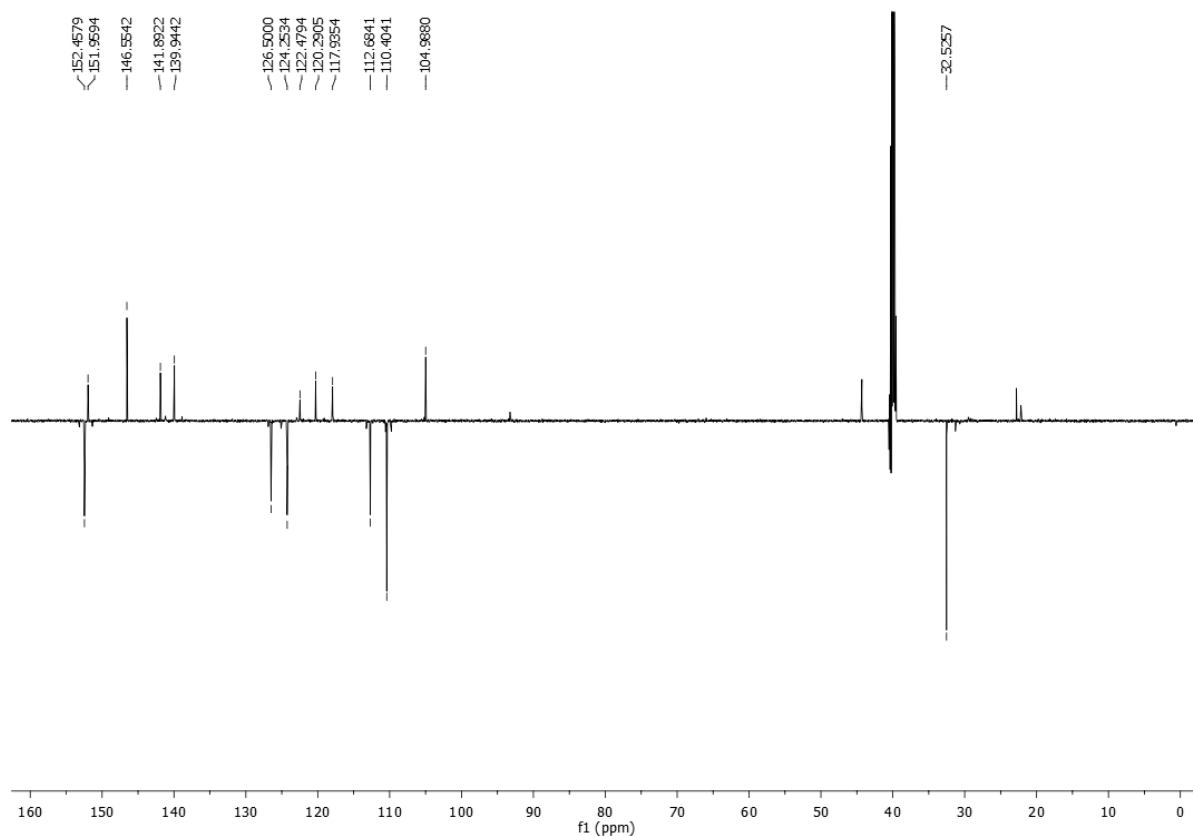

**Figure S51.**  $^1\text{H}$  NMR spectrum (DMSO- $d_6$ , 600 MHz) of *(E)*-3-(4-hydroxyphenyl)-2-(1-phenyl-1H-benzo[d]imidazol-2-yl)acrylonitrile 42

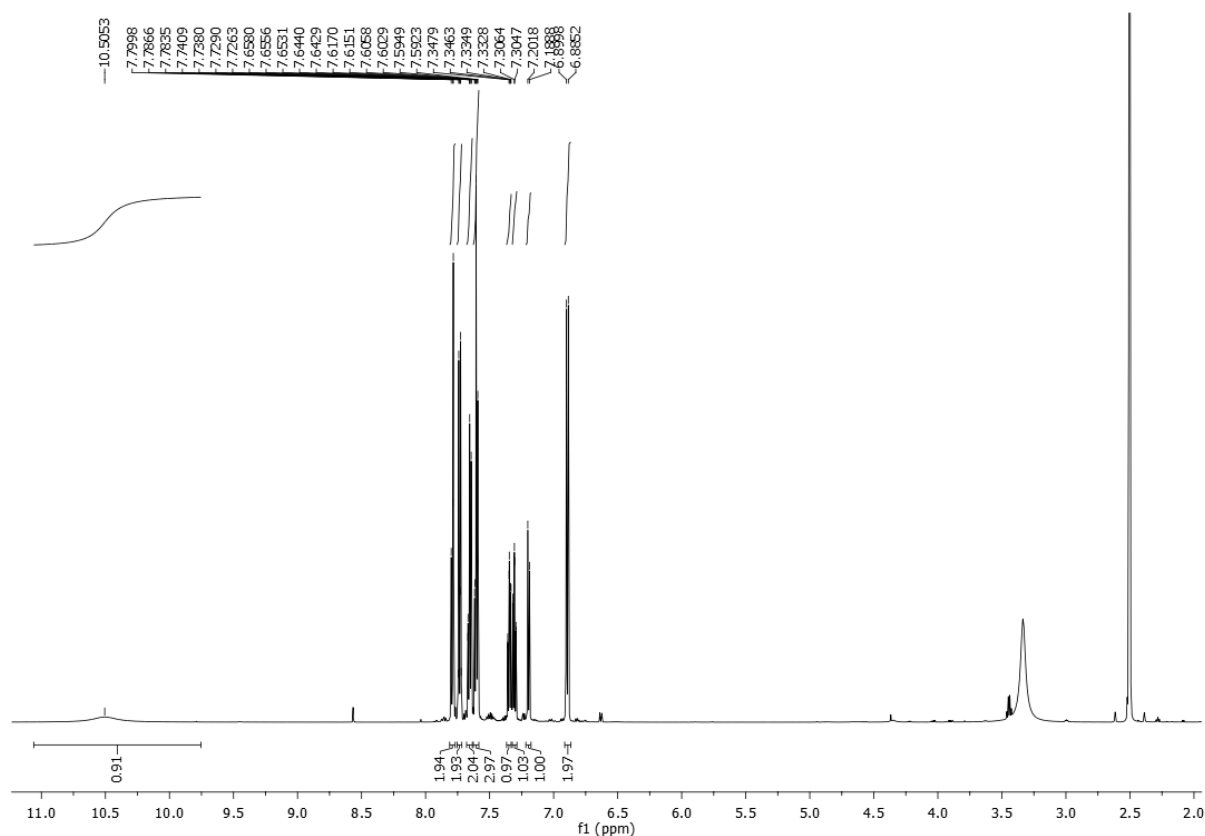

**Figure S52.**  $^{13}\text{C}$  NMR spectrum (DMSO- $d_6$ , 151 MHz) of *(E)*-3-(4-hydroxyphenyl)-2-(1-phenyl-1H-benzo[d]imidazol-2-yl)acrylonitrile 42

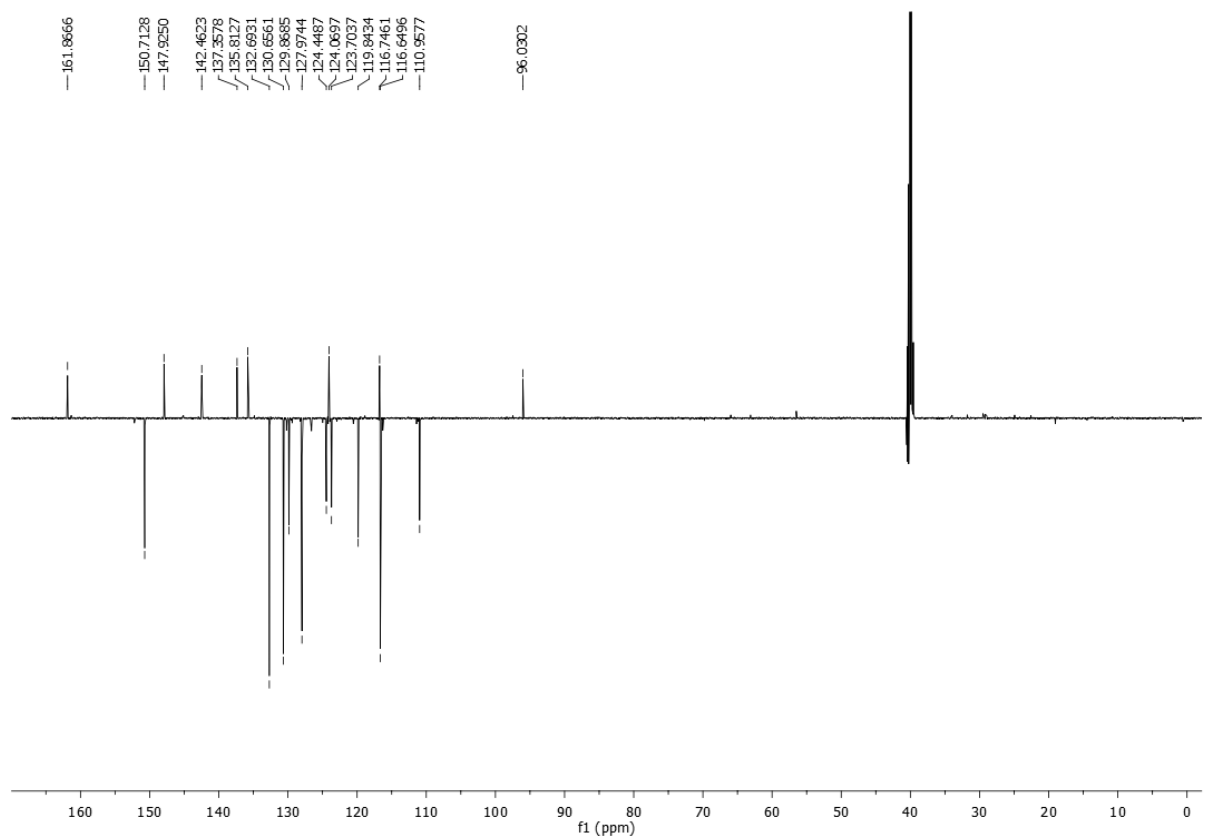

**Figure S53.**  $^1\text{H}$  NMR spectrum (DMSO- $d_6$ , 600 MHz) of *(E)*-3-(3,4-dihydroxyphenyl)-2-(1-phenyl-1H-benzo[d]imidazol-2-yl)acrylonitrile 43

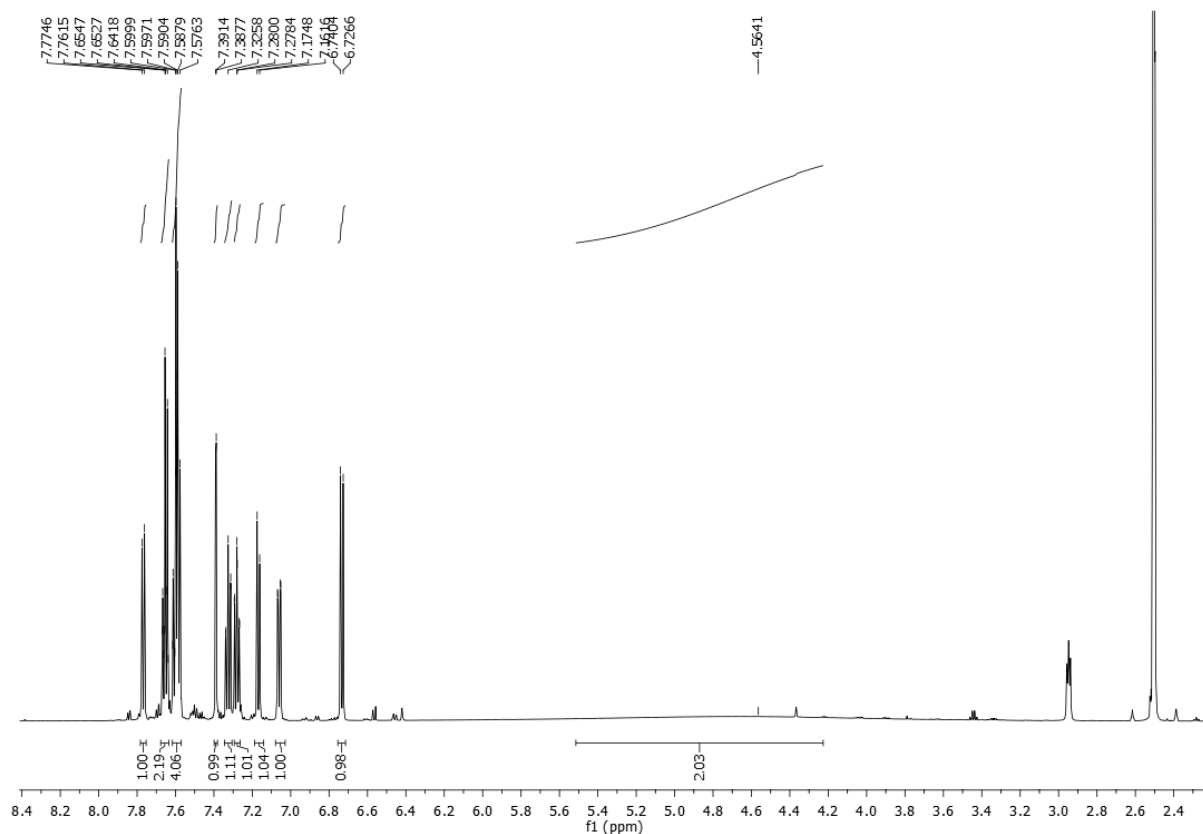

**Figure S54.**  $^{13}\text{C}$  NMR spectrum (DMSO- $d_6$ , 151 MHz) of *(E)*-3-(3,4-dihydroxyphenyl)-2-(1-phenyl-1H-benzo[d]imidazol-2-yl)acrylonitrile 43

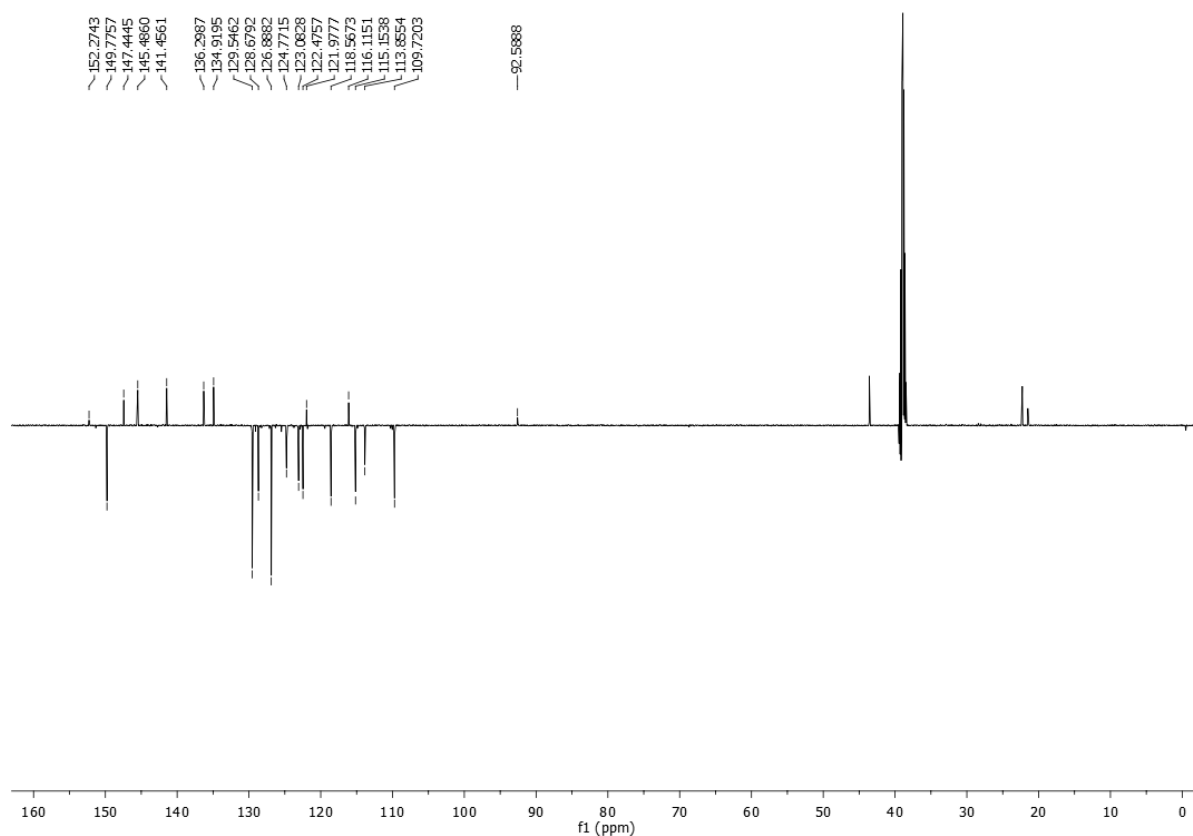

**Figure S55.**  $^1\text{H}$  NMR spectrum ( $\text{DMSO-}d_6$ , 600 MHz) of *(E)*-2-(1-phenyl-1H-benzof[d]imidazol-2-yl)-3-(3,4,5-trihydroxyphenyl)acrylonitrile 44

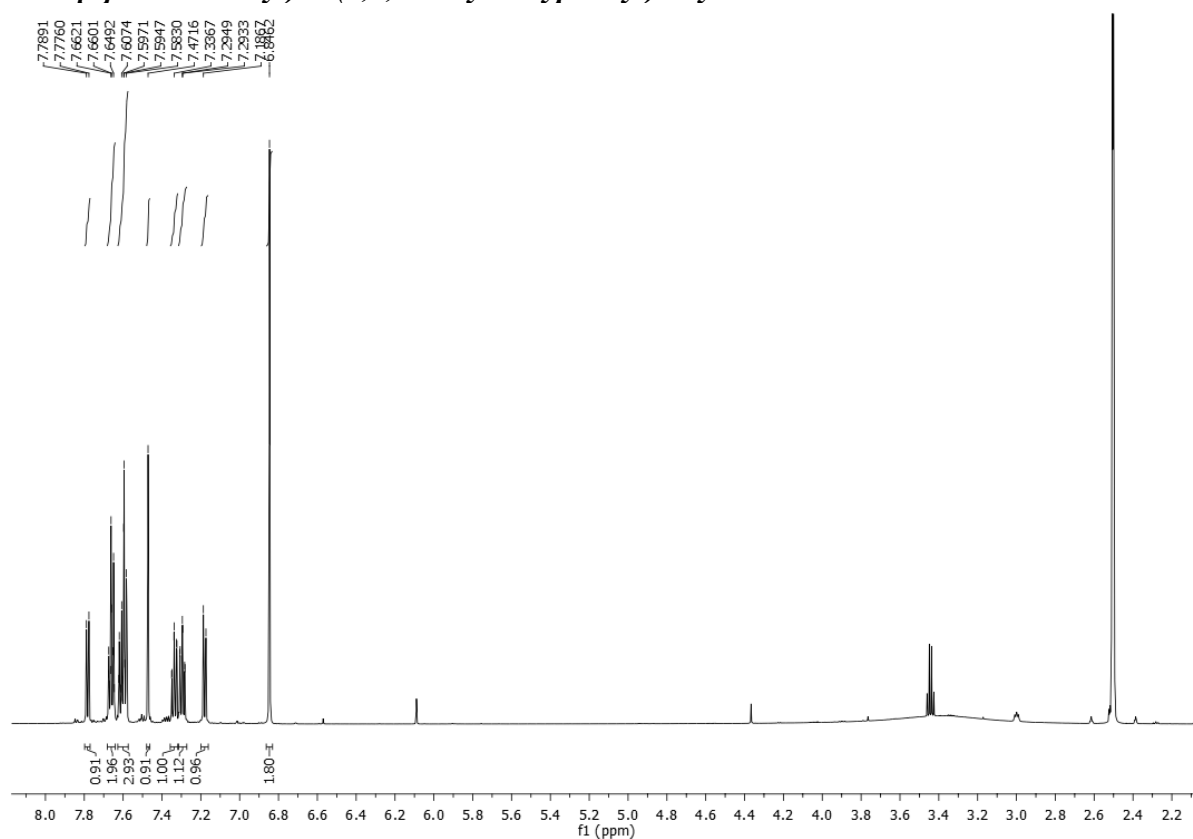

**Figure S56.**  $^{13}\text{C}$  NMR spectrum ( $\text{DMSO-}d_6$ , 151 MHz) of *(E)*-2-(1-phenyl-1H-benzof[d]imidazol-2-yl)-3-(3,4,5-trihydroxyphenyl)acrylonitrile 44

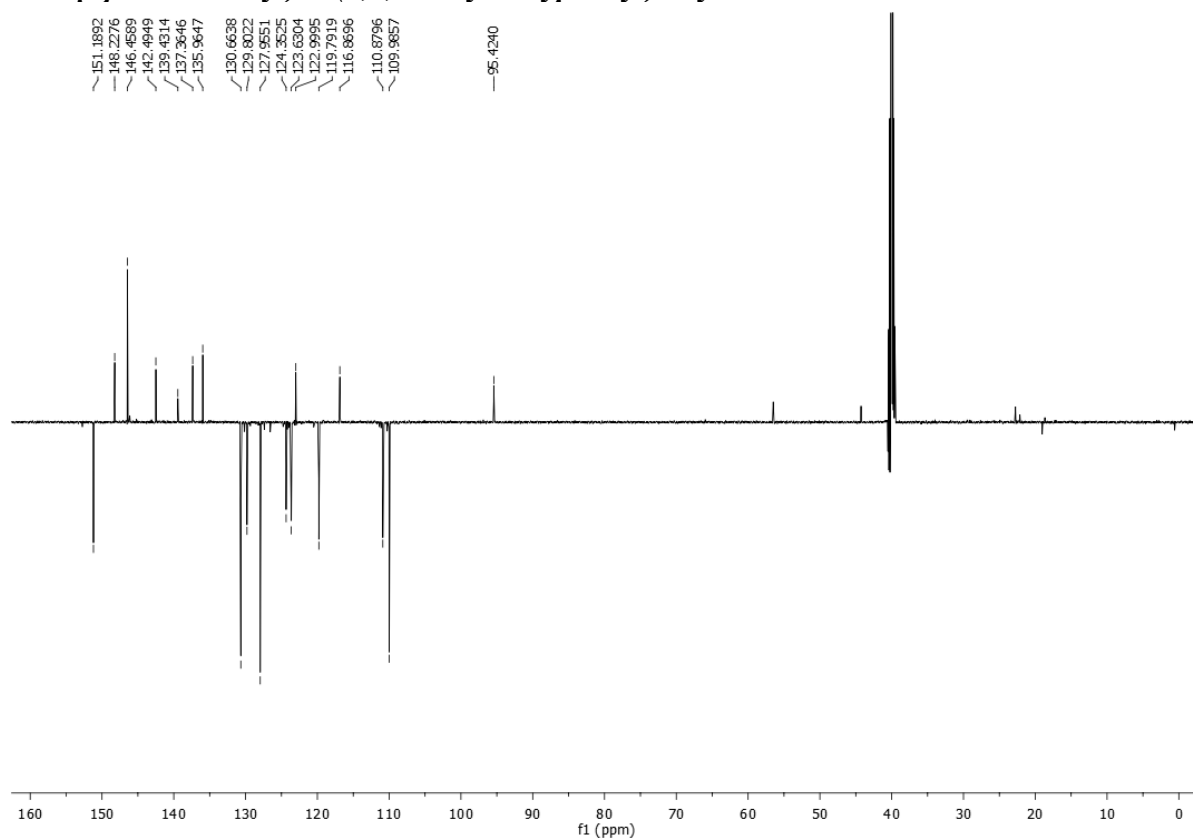

**Figure S57.**  $^1\text{H}$  NMR spectrum (DMSO- $d_6$ , 600 MHz) of *(E)*-2-(1-cyano-2-(4-hydroxyphenyl)vinyl)-1-phenyl-1H-benzo[d]imidazole-6-carbonitrile 45

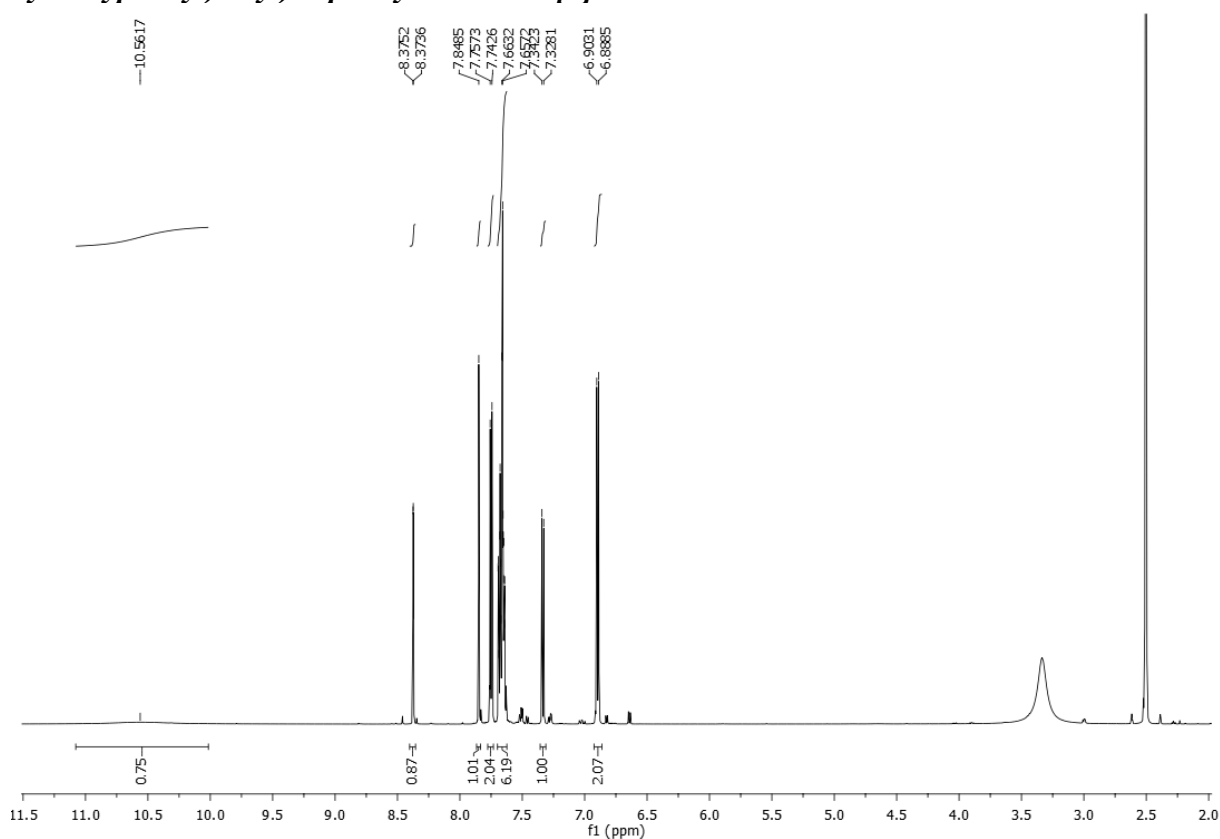

**Figure S58.**  $^{13}\text{C}$  NMR spectrum (DMSO- $d_6$ , 151 MHz) of *(E)*-2-(1-cyano-2-(4-hydroxyphenyl)vinyl)-1-phenyl-1H-benzo[d]imidazole-6-carbonitrile 45

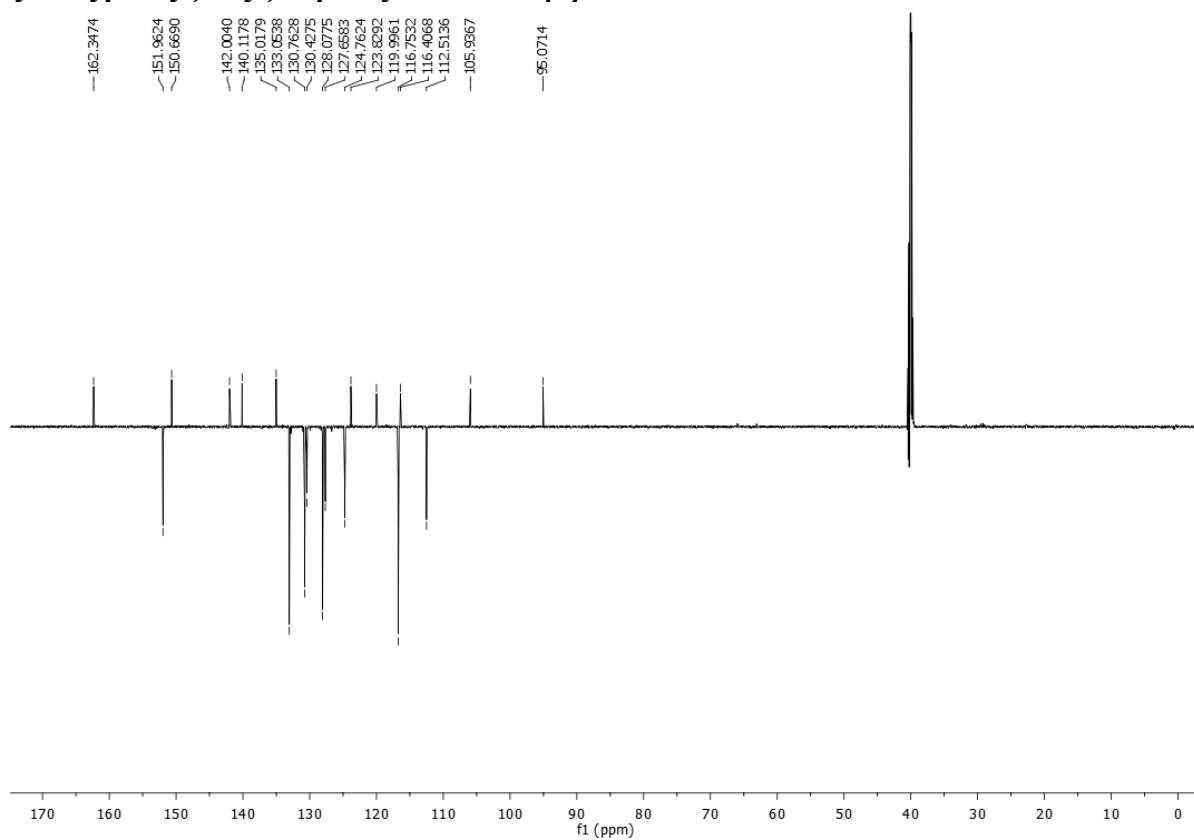

**Figure S59.**  $^1\text{H}$  NMR spectrum (DMSO- $d_6$ , 600 MHz) of *(E)*-2-(1-cyano-2-(3,4-dihydroxyphenyl)vinyl)-1-phenyl-1H-benzo[d]imidazole-6-carbonitrile 46

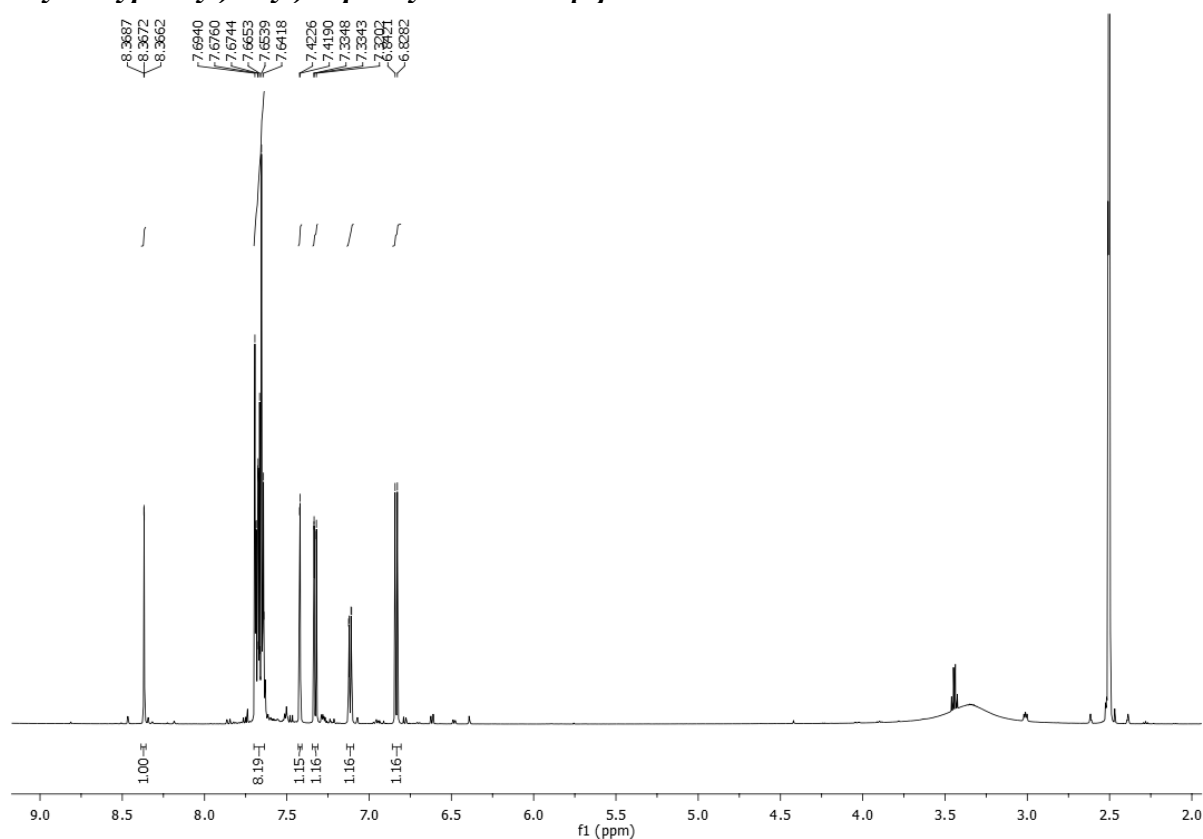

**Figure S60.**  $^{13}\text{C}$  NMR spectrum (DMSO- $d_6$ , 151 MHz) of *(E)*-2-(1-cyano-2-(3,4-dihydroxyphenyl)vinyl)-1-phenyl-1H-benzo[d]imidazole-6-carbonitrile 46

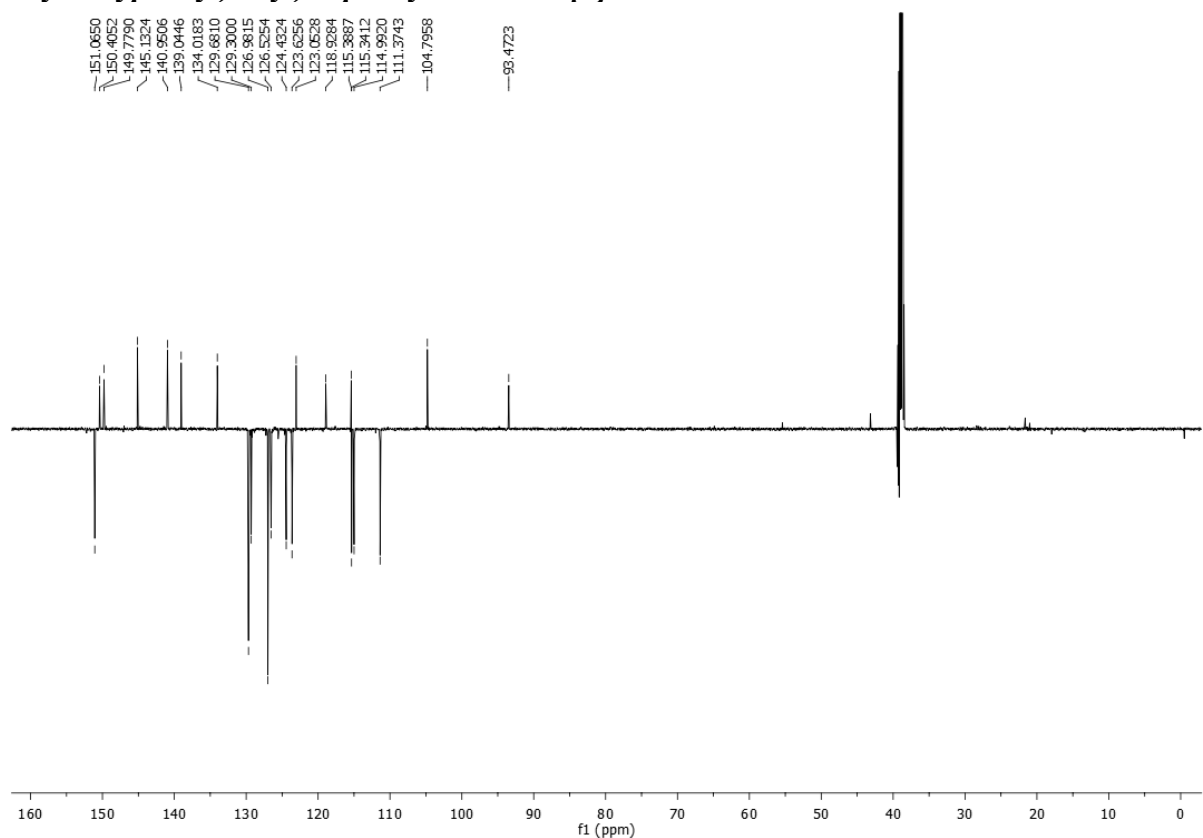

**Figure S61.**  $^1\text{H}$  NMR spectrum (DMSO- $d_6$ , 600 MHz) of *(E)*-2-(1-cyano-2-(3,4,5-trihydroxyphenyl)vinyl)-1-phenyl-1H-benzo[d]imidazole-6-carbonitrile 47

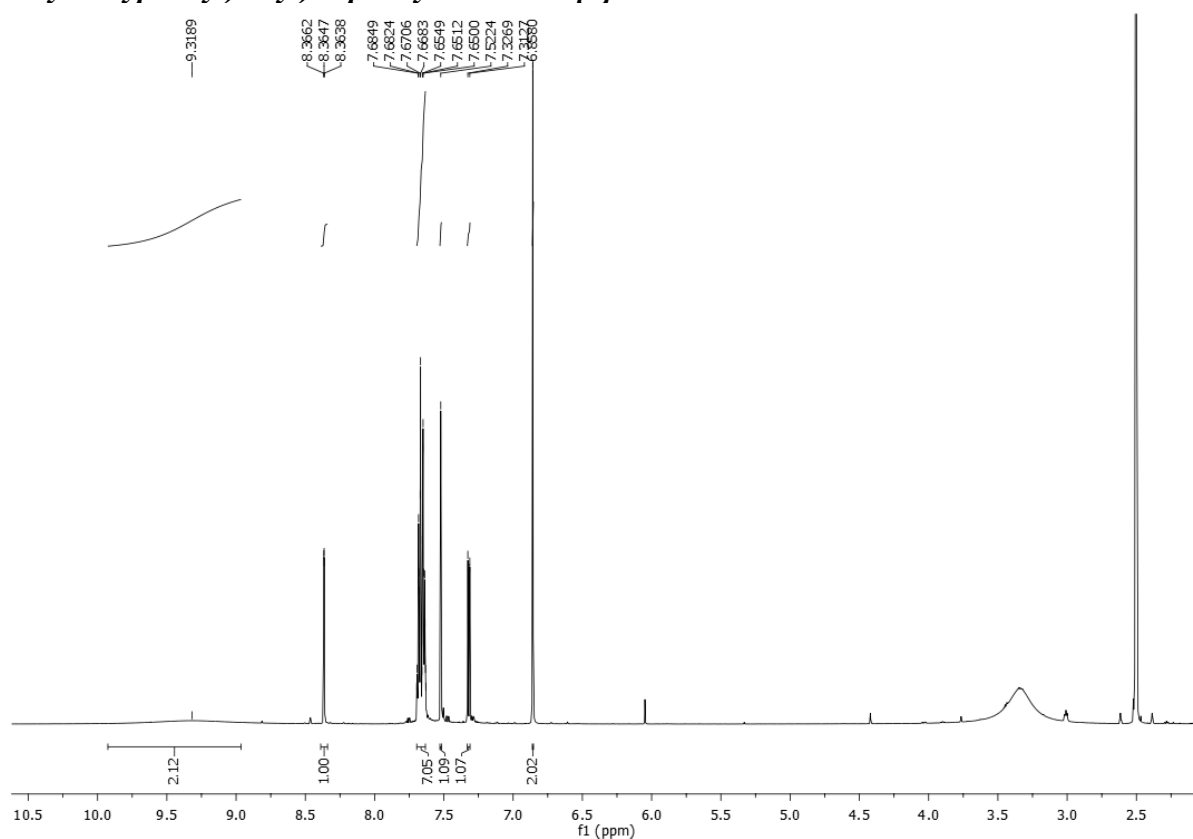

**Figure S62.**  $^{13}\text{C}$  NMR spectrum (DMSO- $d_6$ , 151 MHz) of *(E)*-2-(1-cyano-2-(3,4,5-trihydroxyphenyl)vinyl)-1-phenyl-1H-benzo[d]imidazole-6-carbonitrile 47

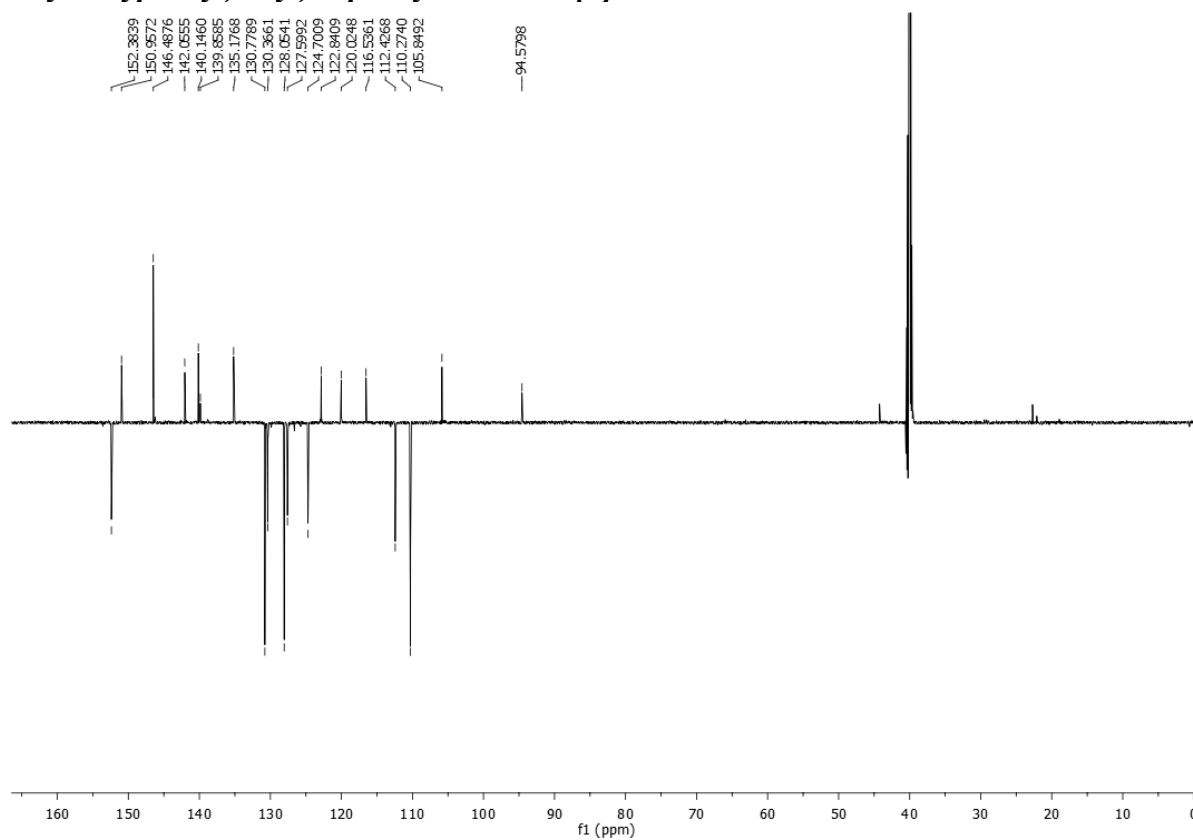



**Figure S63.** Reaction scheme for preparing the compounds **1-6** which synthesis has been already published.

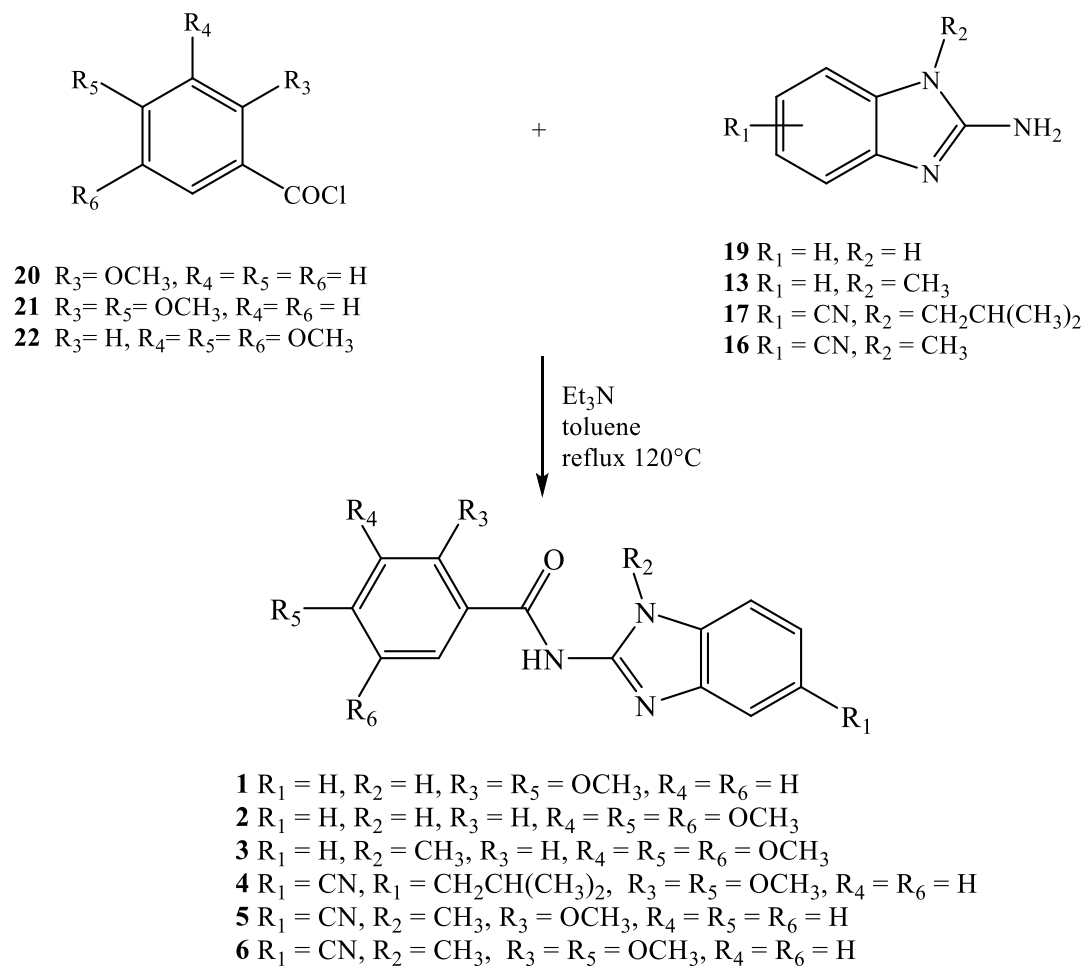

Supplement: s1 [file s1]
